# Supplementary material for: Comprehensive screening for PRSS1, SPINK1, CFTR, CTRC and CLDN2 gene mutations in Chinese paediatric patients with idiopathic chronic pancreatitis: a cohort study
Source: PubMed Central journal article supplement — BMJ Open. 2013 Sep 2;3(9):e003150. doi: 10.1136/bmjopen-2013-003150 (PMC3773632; doi:10.1136/bmjopen-2013-003150), 2013-09-02
Supplement: bmjopen-2013-003150.draft_revisions.pdf [file bmjopen-2013-003150.draft_revisions.pdf]

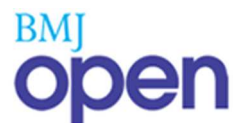

**Comprehensive Screening for PRSS1, SPINK1, CFTR, CTRC  
and CLDN2 Gene Mutations in Chinese Pediatric Patients  
with Idiopathic Chronic Pancreatitis**

|                                 |                                                                                                                                                                                                                                           |
|---------------------------------|-------------------------------------------------------------------------------------------------------------------------------------------------------------------------------------------------------------------------------------------|
| Journal:                        | <i>BMJ Open</i>                                                                                                                                                                                                                           |
| Manuscript ID:                  | bmjopen-2013-003150                                                                                                                                                                                                                       |
| Article Type:                   | Research                                                                                                                                                                                                                                  |
| Date Submitted by the Author:   | 02-May-2013                                                                                                                                                                                                                               |
| Complete List of Authors:       | Wang, Wei<br>Sun, Xiao-Tian<br>Weng, Xiao-Ling<br>Zhou, Dai-Zhan<br>Sun, Chang<br>Xia, Tian<br>Hu, Liang-Hao<br>Lai, Xiao-Wei<br>Ye, Bo<br>Liu, Mu-Yun<br>Jiang, Fei<br>Gao, Jun<br>Bo, Lu-Min<br>Liu, Yun<br>Liao, Zhuan<br>Li, Zhaoshen |
| <b>Primary Subject Heading</b>: | Gastroenterology and hepatology                                                                                                                                                                                                           |
| Secondary Subject Heading:      | Gastroenterology and hepatology                                                                                                                                                                                                           |
| Keywords:                       | Paediatric gastroenterology < PAEDIATRICS, GASTROENTEROLOGY, GENETICS                                                                                                                                                                     |
|                                 |                                                                                                                                                                                                                                           |

SCHOLARONE™  
Manuscripts

1  
2  
3  
4 **Comprehensive Screening for *PRSS1*, *SPINK1*, *CFTR*, *CTRC* and**  
5  
6  
7 ***CLDN2* Gene Mutations in Chinese Pediatric Patients with**  
8  
9  
10 **Idiopathic Chronic Pancreatitis**

11  
12 Wei Wang <sup>1,\*</sup>, Xiao-Tian Sun <sup>1,\*</sup>, Xiao-Ling Weng <sup>2,\*</sup>, Dai-Zhan Zhou <sup>2,\*</sup>, Chang Sun <sup>1</sup>, Tian  
13 Xia <sup>1</sup>, Liang-Hao Hu <sup>1</sup>, Xiao-Wei Lai <sup>1</sup>, Bo Ye <sup>1</sup>, Mu-Yun Liu <sup>1</sup>, Fei Jiang <sup>1</sup>, Jun Gao <sup>1</sup>,  
14 Lu-Min Bo <sup>1</sup>, Yun Liu <sup>2</sup>, Zhuan Liao <sup>1,#</sup>, Zhao-Shen Li <sup>1,#</sup>

15  
16  
17  
18  
19  
20 <sup>1</sup> Department of Gastroenterology, Changhai Hospital, The Second Military Medicine  
21 University, Shanghai, China

22  
23 <sup>2</sup> Key Laboratory of Developmental Genetics and Neuropsychiatric Diseases (Ministry of  
24 Education), Bio-X Institutes, Shanghai Jiao Tong University, Shanghai, China

25  
26  
27  
28  
29 *\*These four authors contributed equally to this work.*

30  
31  
32  
33 This work was supported by grants from the National Natural Science Foundation of China  
34 (No.81270541, to L.Z.), Shanghai Rising-Star Program (No.13QA1404600, to L.Z.),  
35 Outstanding Young Scholars Fund of Second Military Medical University (to L.Z.), and  
36 Disciplinary Joint Research Projects of Changhai Hospital (No.CH125510312, to L.Z.).

37  
38  
39  
40  
41 *#Corresponding author:* Prof. Zhao-Shen Li (Email: [zhaoshenli@hotmail.com](mailto:zhaoshenli@hotmail.com)), OR Zhuan  
42 Liao (Email: [liao.zhuan@gmail.com](mailto:liao.zhuan@gmail.com)), Department of Gastroenterology, Changhai Hospital,  
43 The Second Military Medical University, 168 Changhai Road, Shanghai, 200433, China. Tel.:  
44 +86-21-31161335; Fax: +86-21-55621735.

45  
46  
47  
48  
49  
50 **Competing interest:** There is no conflict of interest to declare.

## Article summary

### Article Focus

- Genetic alterations may contribute to chronic pancreatitis in Chinese young patients.
- China is different from the Western countries in regards to ethnic and cultural backgrounds, socioeconomic status, climatic conditions, and dietary habits.

### Key Messages

- SPINK1 IVS3+2T>C mutation was more commonly associated with Chinese ICP children.
- Pediatric patients with SPINK1 IVS3+2T>C mutation had a higher rate of pancreatic duct stones, pancreatic pseudocyst, and pancreatic calcification than those without.
- SPINK1 IVS3+2T>C mutation may play an important role in the pathogenesis of Chinese pediatric ICP, which may show some insights into a novel target for therapy.

### Strengths and Limitations

- To the best of our knowledge, this is the first study to determine the spectrum and frequency of *PRSS1*, *SPINK1*, *CFTR*, *CTRC* and *CLDN2* gene mutations and *PRSS1* CNVs in unrelated CP children in China.
- Further study is needed to confirm and to investigate the role of these genes in the development of Chinese ICP.

## Abstract

**Objective:** Genetic alterations may contribute to chronic pancreatitis (CP) in Chinese young patients. This study was designed to investigate mutations of cationic trypsinogen (*PRSSI*), pancreatic secretory trypsin inhibitor or serine protease inhibitor Kazal type 1 (*SPINK1*), cystic fibrosis transmembrane conductance regulator (*CFTR*), chymotrypsin C (*CTRC*), and *CLDN2* genes and the copy number variations (CNVs) of *PRSSI* and assess associations with the development of idiopathic CP (ICP) in Chinese children. **Methods:** Seventy-five ICP children (40 boys and 35 girls) were recruited for the assessment of *PRSSI*, *SPINK1*, *CFTR*, *CTRC* and *CLDN2* gene mutations and CNVs using DNA sequencing and TaqMan® Probe-Based Gene Expression Analysis, respectively. **Results:** Seven patients had heterozygous mutations in *PRSSI*, i.e. N29I (n=1), R122H or R122C (n=6). The CNVs of *PRSSI* in five patients had unmolar copies [1 copy (n=4), five copies (n=1)]. 43 patients had IVS3+2T>C (rs148954387) (10 homozygous and 33 heterozygous) in *SPINK1*. None of the *PRSSI* mutation patients carried a *SPINK1* mutation. Frequency of *PRSSI* and *SPINK1* mutations was 9.3% and 57.3%, respectively, with an overall frequency of 66.6% (50/75). In addition, one patient had a novel deletion of *CFTR* (GCTTCCTA from c.500 to c.508 leading to the shortened polypeptide molecule via a stop codon). Another patient had a novel missense in *CLDN2* exon 2 (c.592A>C mutation). Clinically, patients with *SPINK1* mutations had a higher rate of pancreatic duct stones, pancreatic pseudocyst, and pancreatic calcification than those without *SPINK1* mutations (P<0.05). **Conclusions:** *SPINK1* mutations were more commonly associated with Chinese ICP children. *SPINK1* IVS3+2T>C mutation may play an important role in the pathogenesis of Chinese pediatric ICP. However, further study is needed to confirm and to investigate the role of these genes in the development of Chinese ICP.

**Key words:** idiopathic chronic pancreatitis, *PRSSI*, *SPINK1*, *CFTR*, *CTRC*, *CLDN2*, CNVs, children

## Introduction

Chronic pancreatitis is an inflammatory disease characterized by irreversible destruction of the pancreatic normal structure and function and is associated with persistent abdominal pain or steatorrhea. In adults, alcohol abuse is an important cause of chronic pancreatitis, while other factors (such as anatomical changes, metabolic disease, trauma and heredity) may also cause or associate with chronic pancreatitis. However, up to 10-25% of patients with chronic pancreatitis have no clear risk factors and these patients are classified as having idiopathic chronic pancreatitis (ICP)<sup>1</sup>. In children, it is estimated that ICP accounts for approximately 40-60% of all children with chronic pancreatitis in Western countries, but the reported rate was as high as 73.8% in China<sup>2</sup>. The pathogenesis of ICP, especially in children, remains poorly understood. Since the conventional risk factors such as alcohol abuse are uncommon in children, it has reported that environmental risk factors may play a limited role in the pathogenesis of ICP in children; thus, patients with ICP at these ages are thought to be suitable for studies of genetic defects<sup>3</sup>.

Over the last two decades, genetic factors have been shown in patients with chronic pancreatitis and these factors are believed to play an important role in the pathogenesis of chronic pancreatitis<sup>4</sup>. For example, previous studies reported identification of mutations in genes encoding cationic trypsinogen (UniGene name: protease serine 1: *PRSSI*) (OMIM 276000)<sup>5</sup>, cystic fibrosis transmembrane conductance regulator (*CFTR*) (OMIM 602421)<sup>6</sup>, the pancreatic secretory trypsin inhibitor or serine protease inhibitor Kazal type 1 (PSTI or *SPINK1*) (OMIM 167790)<sup>3</sup>, and chymotrypsin C (*CTRC*) (OMIM 601405)<sup>7</sup>, all of which reveal that hereditary pancreatitis is a more common form of chronic pancreatitis than once thought<sup>1</sup>. More recently, a newly detected candidate gene known as *CLDN2* has been shown to be associated with sporadic and alcohol-related chronic pancreatitis<sup>8</sup>. Thus, genetic study may reveal a genetic basis for significant percentage of patients with so-called “idiopathic” chronic pancreatitis. It becomes acceptable that development of chronic pancreatitis requires a combination of genetic predisposition and environmental, structural, or toxic insult<sup>9</sup>.

Therefore, identification of genetic and environmental risk factors could offer the potential tool for risk assessment, early diagnosis, and earlier intervention of chronic pancreatitis <sup>10</sup>.

Many studies have discovered that mutations plus the copy number variations (CNVs) in *PRSSI* (trypsinogen), *SPINK1* (serine protease inhibitor Kazal-type 1), *CFTR* (cystic fibrosis transmembrane conductance regulator), and *CTRC* (chymotrypsin C, also known as caldecrin) were causally linked to the pathogenesis of ICP <sup>11-13</sup>, while patients with *PRSSI* or *SPINK1* mutations may be at a higher risk of developing pancreatic cancer <sup>14</sup>. *CFTR* variants were associated with idiopathic and alcoholic chronic pancreatitis. Furthermore, *CLDN2* was shown to be strongly associated with chronic pancreatitis, suggesting that it probably acts as a disease modifier to accelerate the development and progression of chronic pancreatitis through a non-trypsin-dependent process since *CLDN2* is a highly regulated tight junction protein to form ion and water channels between endothelial cells <sup>8</sup>. However, as the largest populated country in the world, the incidence of chronic pancreatitis, including pediatric chronic pancreatitis, has risen rapidly <sup>2, 15</sup>, whereas there have been only a few studies reporting that genetic factors contributed the pathogenesis of chronic pancreatitis in China, but none of these studies focused on ICP in children <sup>13, 16</sup>. In addition, China is different from the Western countries in regards to ethnic and cultural backgrounds, socioeconomic status, climatic conditions, and dietary habits. In this pilot study, we identified mutations in *PRSSI*, *SPINK1*, *CFTR*, *CTRC* and *CLDN2* genes and CNVs of *PRSSI* to determine the spectrum and frequency of the mutations and CNVs in unrelated children with ICP in the mainland of China. The data from this study will provide information into the genetic basis of pediatric ICP in China.

## Patients and Methods

### *Study population and diagnosis criteria*

We recruited 75 ICP patients under 18 years old from Changhai Hospital between January 1997 and December 2008. There was no history of tobacco smoking or alcohol

1  
2  
3  
4  
5  
6  
7  
8  
9  
10  
11  
12  
13  
14  
15  
16  
17  
18  
19  
20  
21  
22  
23  
24  
25  
26  
27  
28  
29  
30  
31  
32  
33  
34  
35  
36  
37  
38  
39  
40  
41  
42  
43  
44  
45  
46  
47  
48  
49  
50  
51  
52  
53  
54  
55  
56  
57  
58  
59  
60

consumption in these patients. All patients originated from the Han ethnicity in the mainland of China. The diagnose criteria of CP and ICP was defined as a condition characterized by typical history (abdominal pain, diabetes mellitus and/or steatorrhea) and the presence of any one of the following findings: i) ductal changes on ERCP; ii) pancreatic calcification on imaging examination; or iii) histological evidence of CP<sup>17-18</sup>. Furthermore, affected individuals were classified as having ICP if precipitating risk factors (such as alcohol abuse, trauma, previous medication, infection, metabolic disorders and/or a positive family history) were absent<sup>19</sup>. This study was approved by the Ethics Committee of Changhai Hospital, Shanghai and a written informed consent was given by their parents or legal guardians according to the ethical guidelines of the Declaration of Helsinki.

### ***DNA isolation***

Peripheral blood samples were collected from each patient in a ethylene diamine tetra acetic acid (EDTA)-anticoagulated tube and frozen at -20°C for subsequent DNA extraction. Genomic DNA was isolated from 500 µl samples using the Lab-aid 800 automatic nucleic acid extraction machine following a standard protocol and quantified using a NanoDrop machine (Thermo, Wilmington, USA).

### ***PCR analyses of gene mutations***

DNA samples from patients were subjected to polymerase chain reaction (PCR) analyses of gene mutations. Specifically, primers flanking the targeted regions of *PRSSI*, *SPINK1*, *CFTR*, *CTRC* and *CLDN2* genes were designed and synthesized according to the nucleotide sequence published by NCBI as shown in supplemental Table 1. The data on mutation analyses were confirmed by DNA sequence and repeated using PCR. PCR was performed in the GeneAmp 9700 System (Applied Biosystems, Foster city, CA) using a 15-µL reaction mixture containing 7.5 µl 2×Taq Mix (Vivantis, USA), 5.7 µl ddH<sub>2</sub>O, 1.5 µl DNA templates (10 ng/µl), and 0.15 µl of each primer (20 mM). PCR amplification was set at an initial 6 min

1  
2  
3 denaturation at 94°C, followed by 35 cycles of 30 s at 94°C, 30 s at 58°C (*PRSS1*, *SPINK1*)  
4 or 56°C (*CFTR*, *CTRC*, *CLDN2*), 45 s at 72°C, and a final extension at 72°C for 7 min. PCR  
5 products were then incubated with 0.1 U shrimp alkaline phosphatase at 37°C for 1 h,  
6 followed by heat inactivation at 85°C for 20 min and then sequenced using an ABI Prism  
7 BigDye Terminator Cycle Sequencing Kit, version 3.1 on an ABI Prism 3730 sequencer  
8 (Applied Biosystems). Data passed a duplicate quality-control test using four samples and  
9 showed 100% concordance.  
10  
11

12  
13  
14  
15  
16  
17  
18 Vector NT1, Chromas and Bioedit software were applied to analyze the results.  
19  
20

### 21 22 23 ***Detection of gene copy number variations (CNVs)*** 24

25  
26 A pre-designed and validated CNV assay kit to assess *PRSS1* CNVs was obtained from  
27 AB Life Technologies (Hs03184214\_cn) (see details in supplemental Table 2). RT-PCR was  
28 performed using 2×Taqman Genotyping Master Mix 5 µl (Vivantis), ddH<sub>2</sub>O 0.5 µl, DNA  
29 templates (10 ng/µl) 4 µl, 0.25 µl Taqman Copy Number Assay (Vivantis) and 0.25 Taqman  
30 Copy Number Assay (Vivantis) in a total volume of 10 µl. Cycle conditions were as follows:  
31 initial denaturation for 10 minutes at 95°C, followed by 40 cycles of (15 s at 95°C, and 60s at  
32 60°C) in an 7900 RT-PCR thermal cycler (Applied Biosystems). The assays were performed  
33 in triplicate and repeated at least once for each sample. *PRSS1* gene copy number was  
34 calculated compared to the proportion to RNaseP reference assay (AB Life Technologies  
35 cat#4403326). Data were analyzed using Copy Caller Software (version 1.0 from AB Life  
36 Technologies).  
37  
38  
39  
40  
41  
42  
43  
44  
45  
46  
47  
48  
49  
50

### 51 ***Statistical analyses*** 52

53  
54 Continuous data were reported as mean ± standard deviation (SD) analyzed using a  
55 Student's t-test and/or u-test. Fisher's exact test or chi-square test was used to analyze the  
56 categorical data. The gene mutations or CNVs were associated with age at diagnosis,  
57  
58  
59  
60



1  
2  
3 pancreatic calcification, changes in pancreatic duct (stenosis or dilatation), pancreatic  
4 calcification, and pancreatic pseudocyst for clinical significance of these mutations<sup>19</sup>.  
5  
6

7 The age onset was divided into two subgroups according to the mean value. A *P* value  
8 of less than 0.05 was considered statistically significant and all reported *P* values were  
9 two-sided.  
10  
11  
12

## 13 14 15 16 17 **Results**

### 18 19 *Baseline clinical characteristics of study participants*

20  
21 A total of 75 unrelated children were included in this study, i.e., 40 boys and 35 girls and  
22 age at first onset was  $11.91 \pm 3.79$  years (ranged between 3 and 18 years). Clinically, 81.3%  
23 (61/75) of the patients showed acute pancreatitis, 13 patients began with pure abdominal pain,  
24 3 patients with weight loss, 1 patient with diarrhea, and 1 patient with high blood glucose.  
25  
26  
27  
28  
29

30 Imaging examinations, including CT, MRCP or ERCP, detected pancreatic duct stones  
31 in 45 patients, changes in pancreatic duct (stenosis or dilatation) in 57 patients, pancreatic  
32 calcification in 15 patients, pancreatic pseudocyst in 15 patients, and pancreatic divisum in 4  
33 patients (Table 1). Laboratory tests showed that six patients had increased levels of CA199, a  
34 biomarker for pancreatic cancer, six patients had high blood cholesterol, two had increased  
35 blood glucose, and two patients had low blood calcium levels.  
36  
37  
38  
39  
40  
41  
42  
43  
44

### 45 46 *Analyses of PRSSI, SPINK1, CFTR and CTRC gene mutations in these patients*

47  
48 We then analyzed mutations of *PRSSI*, *SPINK1*, *CFTR* and *CTRC* gene in these 75  
49 patients and found three types of heterozygous *PRSSI* mutations in seven patients, including  
50 N29I (n=1) in exon 2, and R122H (n=6) with c.365G>A (n=5) and c.364C> T (n=1) in exon  
51 3. A single gene mutation of *SPINK1* occurred in 43 patients, including 10 homozygous and  
52 33 heterozygous *SPINK1* mutation (IVS3+2T>C). However, there was no single patient with  
53  
54  
55  
56  
57  
58  
59  
60  
*PRSSI* mutation who had a *SPINK1* mutation, making 9.3% (7/75) and 57.3% (43/75) of,

1  
2  
3 *PRSSI* and *SPINK1* mutation rates, respectively and an overall rate of 66.6% (50/75) of  
4 patients who at least had one *PRSSI* or *SPINK1* mutation (Table 2).  
5

6  
7 Furthermore, one patient had *CFTR* gene deletions of GCTTCCTA sequences between  
8 c.500 to c.508 at exon4, leading to an early stop codon (Figure 1). *CFTR* gene C.2562 T>G  
9 polymorphism was also detected in 51 patients, 14 of whom were homozygous.  
10 Heterozygous *CFTR* gene c.4389G>A mutation was identified in another patient. Moreover,  
11 there were four types of TG-repeats and poly-T tract including (TG)10-T7(n=2),  
12 (TG)11-T7(n=55), (TG)12-T5(n=5) and (TG)12-T7(n=13) in the junction of intron 8 and  
13 exon 9 and (TG)11-T7 of *CFTR* gene found in 73.3% of these patients (supplemental Table  
14 3). In addition, *CFTR* gene V allele was slightly more frequent than the M allele at codon 470  
15 (59.3% and 40.7%, respectively). The dominant genotype was M/V followed by V/V and  
16 M/M (supplemental Table 4).  
17  
18  
19  
20  
21  
22  
23  
24  
25  
26

27 However, we screened six types of CTTC mutations, including c.143A>G, c.217G>A,  
28 c.180C>T in exon 3, c.703G>A, c.760C>T, and p.K247\_R254del in exon 7 in these 75  
29 patients, but did not find any mutations. In addition, we screened both exons of *CLDN2* and  
30 found four types of heterozygous mutations in a total of 26 patients (Table 2), i.e., c.22G>A  
31 at exon 1, c.327A>T, c.592A>C and c.768T>C at exon 2. C.592A>C is a missense mutation,  
32 while the other three types are nonsense. However, none of these patients had more than one  
33 type of *CLDN2* mutation.  
34  
35  
36  
37  
38  
39  
40  
41  
42  
43

#### 44 *Analyses of PRSSI gene copy number variations in these patients*

45  
46 *PRSSI* gene copy numbers were normal in most patients. Specifically, *PRSSI* gene copy  
47 number in 70 patients had two copies detected using the probe Hs03184214\_cn, whereas four  
48 patients had only one copy and another patient had five copies (Figure 2).  
49  
50  
51  
52  
53  
54  
55

#### 56 *Association of mutations with clinicopathological data*

We associated these genetic alterations with clinicopathological data from the 75 patients. Our data showed that three mutations of IVS3+2T>C in *SPINK1* gene, M470V and c.2562 T>G in *CFTR* gene had relatively higher frequencies than other genetic alterations and were associated with clinicopathological data. Briefly, the rates of pancreatic duct stones, pancreatic pseudocyst and pancreatic calcification were significantly higher in patients with a *SPINK1* gene IVS3+2T>C mutation than that of patients without IVS3+2T>C (69.8% vs., 46.9%  $P=0.045$ ; 11.6% vs. 31.25%  $P=0.036$ ; 27.9% vs. 9.4%  $P=0.047$ , respectively). The rate of pancreatic pseudocyst was significantly lower in patients with the *SPINK1* gene IVS3+2T>C mutation than that of patients without IVS3+2T>C (11.6% vs. 31.25%  $P=0.036$ ) (Table 3). However, there was no statistical significance between age at diagnosis of patients with and without IVS3+2T>C mutation. M470V and c.2562 T>G were not significantly associated with these clinical characteristics.

## Discussion

In the present study, we revealed *PRSSI*, *SPINK1*, *CFTR*, *CTRC* and *CLDN2* gene mutations in ICP patients, especially *PRSSI* and *SPINK1* gene mutations, occurred in almost 70% of Chinese ICP children. To the best of our knowledge, this is the first study to determine the spectrum and frequency of *PRSSI*, *SPINK1*, *CFTR*, *CTRC* and *CLDN2* gene mutations and *PRSSI* CNVs in unrelated CP children in China. The data indicate that genetic changes occurring in Chinese ICP patients could associate with ICP development. Further study will investigate how these gene alterations contribute to ICP development.

Our current data on the frequency of *PRSSI* mutations were similar to those (9.3% vs. 9-23%) of a previous study on children with CP or ICP<sup>20</sup>, however, our data on the frequency of *SPINK1* mutations (57.3%) appeared higher than those (19-40%) reported in the previous study<sup>3</sup>. Moreover, Witt et al.<sup>20</sup> first showed *PRSSI* gene mutations (3/30 cases at 3×A16V) in German pediatric CP patients. Thereafter, they showed that in a study of 96 unrelated CP children, *PRSSI* gene mutations (5×A16V, 1×N29I, and 5×R122H) occurred in 11 (11.5%)

1  
2  
3 patients<sup>3</sup>. In a review of 164 unrelated children with CP, the frequency was reported to be  
4  
5 9.1% (n=15, 8×A16V, 5×R122H, and 2×N29I)<sup>21</sup>. *PRSSI* gene mutations were detected in  
6  
7 two (12.5%, 1×R122H and 1×A16V) of 16 patients classified as having early-onset ICP in a  
8  
9 Swiss study<sup>22</sup> and in 11 (23.1%) of 52 children with CP (6×R122H, 4×R122C, 1×N29I) in a  
10  
11 Polish study<sup>23</sup>. In our current study, *PRSSI* mutations were found in 9.3% of 75 Chinese  
12  
13 pediatric ICP patients, which included N29I and R122H mutations. Heterozygous mutations  
14  
15 of the *PRSSI* gene commonly occurred in CP patients in the Western populations<sup>20,23</sup> and  
16  
17 was the only form of mutation in our patients, indicating that the main spectrum and  
18  
19 frequency of *PRSSI* gene mutations in Chinese ICP children are similar to those reported in  
20  
21 pediatric patients in Western countries<sup>20-23</sup>. The *PRSSI* mutations seem to be one of the  
22  
23 predisposing factors for ICP, irrespective of race, although the third most common *PRSSI*  
24  
25 mutation (i.e., A16V) is not found in our study. However, these spectrum and frequency are  
26  
27 different from most previous Asian studies, in which *PRSSI* mutations were at a low  
28  
29 frequency or even absent<sup>13, 24-25</sup>. In a previous study on 129 Chinese ICP patients (34  
30  
31 early-onset and 95 late-onset using a cut-off age of 35 years), Chang et al.<sup>13</sup> showed *PRSSI*  
32  
33 mutations in six (4.6%) patients; in two (5.9%) patient with early-onset (1×R116C and  
34  
35 1×C139S) and four (4.2%) patients with late-onset (1×L104P, 1×R116C, 1×T137M and  
36  
37 1×C139S). These mutations are all considered relatively uncommon mutations in Western  
38  
39 countries<sup>26</sup>. The potential reason for this discrepancy may be due to the sampling bias, i.e.,  
40  
41 Chang's study included both children and adults, whereas our current study only included  
42  
43 children.

44  
45 One of the most significant findings in our current study was the high frequency of  
46  
47 *SPINK1* IVS3+2T>C mutation, which was first reported by Kume K et al. They showed a  
48  
49 *SPINK1* IVS3+2T>C mutation in 13-16% of unrelated Japanese ICP patients<sup>27</sup>. However,  
50  
51 two additional studies from Western countries reported IVS 3+2T>C mutation only in one  
52  
53 (1.0%) of 96 and in 3 (2.7%) of 112 pediatric ICP patients<sup>3,12</sup>. the IVS 3+2T>C mutation has  
54  
55 been found in three (1.7%) of 172 German CP patients, but was thought to be a rare  
56  
57 polymorphism and not a mutation<sup>28</sup>. However, a recent Chinese study on 129 ICP patients  
58  
59  
60

1  
2  
3 revealed a IVS 3+2T>C mutation in 8.5% of patients and the mutation was predominantly  
4 responsible for early-onset ICP (29.4% in early-onset vs. 1.1% in late-onset)<sup>13</sup>. Alternatively,  
5 Pfutzer et al. [12] showed a frequency of N34S mutation in *SPINK1* in 40.4% (23/57) of  
6 American ICP children, whereas Truninger et al.<sup>11</sup> reported a frequency of the mutation at  
7 43% (6/14) German patients with early-onset ICP. In patients with tropical calcific  
8 pancreatitis, which is an idiopathic, juvenile, non-alcoholic form of CP widely prevalent in  
9 several tropical countries such as India, N34S mutation can reach 46%. In the present study,  
10 IVS 3+2T>C mutations were found in 57.3% (43/75) of unrelated Chinese ICP children, but  
11 we did not find any N34S mutations in the current study. These data suggest that the  
12 spectrum and frequency of *SPINK1* mutations vary geographically among different  
13 populations; IVS 3+2T>C mutations are more common in Chinese ICP children, whereas  
14 N34S mutations are more frequent in Western populations. The underlying role and  
15 molecular mechanisms of the IVS3+2T>C mutation in CP development are being explored.  
16 For example, this mutation was in complete linkage disequilibrium with -215G>A mutation,  
17 which might alter the efficiency of the *SPINK1* gene transcription. IVS3+2T>C mutation  
18 affects the splicing donor site that is highly conserved in eukaryotes<sup>3</sup>. IVS3+2T>C mutations  
19 can cause skipping of the whole of exon 3, where the trypsin binding site is located, leading  
20 to the loss of the trypsin binding site [27], altered expression of *SPINK1* protein in CP  
21 patients with the IVS3+2T>C mutation, affecting the protease/antiprotease balance within the  
22 pancreas. However, further studies are necessary to elucidate the underlying molecular  
23 mechanisms.

24  
25  
26  
27  
28  
29  
30  
31  
32  
33  
34  
35  
36  
37  
38  
39  
40  
41  
42  
43  
44  
45 In addition, the second significant finding of our current study is *CFTR* gene  
46 polymorphisms, such as M470V (n=51), c.2562T>G (n=51), TG repeats, and poly T tract in  
47 Chinese ICP children. We found that 68% (51/75) patients had both c.2562 T>G and M470V  
48 polymorphisms, including heterozygous and homozygous alleles and one patient with  
49 heterozygous c.4389G>A mutation. Both c.2562T>G and c.4389G>A mutations are nonsense,  
50 while an obstructive tubulopathy of the pancreas due to the *CFTR* dysfunction is thought to  
51 play a primary role in CP development, although the exact pathogenic process of pancreatitis  
52  
53  
54  
55  
56  
57  
58  
59  
60

1  
2  
3 associated with *CFTR* mutations is still under investigation. The function of *CFTR* in the  
4 pancreas is to dilute and alkalinize the protein-rich acinar secretions, so that the formation of  
5 protein plugs that lead to pancreatic injury may be prevented. A M470V polymorphism on  
6 exon 10 affects the intrinsic chloride activity, and thereby affects *CFTR* protein function. The  
7 TG repeats and poly-T tract can influence *CFTR* at transcription levels because these intronic  
8 variants could lead to reductions in protein synthesis and expression, or altered splicing to  
9 compromise the intracellular transport and/or activity. Huang et al conducted the first  
10 comprehensive study on the functional polymorphisms of *CFTR* in Chinese healthy subjects  
11 and found that T7 was the most common haplotype (93.6%) and (TG)11 and (TG)12 were the  
12 dominant haplotypes in the junction of intron 8 and exon 9<sup>29</sup>. Our current data also validated  
13 (TG)11-T7 as the most common type. The poly-T, TG-repeats and M470V distributions were  
14 similar to those studies on other East Asians<sup>30-31</sup>. In addition, a diverse range of *CFTR*  
15 loss-of-function variants have been reported to be associated with ICP and alcoholic CP,  
16 whereas their functional effects remain to be defined. Recently, Whitcomb et al reported that  
17 the coinheritance of *CFTR* R75Q and *SPINK1* variants is significantly higher in patients with  
18 ICP than in controls (8.75% vs. 0.38%). Using patch-clamp techniques, they also found that  
19 the *CFTR* genotype caused a selective defect in bicarbonate conductance<sup>32</sup>. Another study  
20 from Australia showed that symptomatic pancreatitis occurs in 20% of pancreatic sufficient  
21 cystic fibrosis patients. To evaluate genotype–phenotype interactions, they developed the  
22 Pancreatic Insufficiency Prevalence (PIP) score to determine severity in a large number of  
23 *CFTR* mutations and found that specific *CFTR* genotypes were associated with pancreatitis,  
24 i.e., patients carrying genotypes with mild phenotypic effects may have a greater risk of  
25 developing pancreatitis than patients carrying genotypes with moderate-severe phenotypic  
26 consequences at any given time<sup>33</sup>. In addition, common *CFTR* haplotypes seem to modulate  
27 susceptibility to CP.  
28  
29  
30  
31  
32  
33  
34  
35  
36  
37  
38  
39  
40  
41  
42  
43  
44  
45  
46  
47  
48  
49  
50  
51

52  
53 Although multiple rare *CTRC* gene mutations have been associated with CP in European  
54 and Asian populations, our current study did not find any *CTRC* mutations in Chinese ICP  
55 children, indicating that *CTRC* mutation varies geographically or ethnically. According to the  
56  
57  
58  
59  
60

1  
2  
3 biochemical activities and the functional properties of *CTRC* variants, Zhou and Sahin-Tóth  
4 hypothesized three mutually nonexclusive models to demonstrate the possible role of *CTRC*  
5 variants in predisposing to CP: i). Impaired trypsinogen and/or trypsin degradation; ii).  
6 Impaired activation of A-type carboxylpeptidases; and iii). Induction of endoplasmic  
7 reticulum stress<sup>34</sup>. We infer that *CTRC* might play a limited role, if any, in the pathogenesis  
8 of CP in China.  
9

10  
11  
12  
13  
14  
15 However, until 2012, genetic variation in *CLDN2* has not previously been associated  
16 with disease in humans. A two-stage (discovery and replication) genome-wide association  
17 study (GWAS) showed that *CLDN2* genotype confers the greatest risk for CP, and its alleles  
18 via interacting with alcohol consumption, can amplify the risk. These data could partially  
19 explain the higher frequency of alcohol-related pancreatitis in men than women while the real  
20 causal relationship between CP and *CLDN2* has been ambiguously defined. Our current data  
21 are the first study on *CLDN2* SNPs in Chinese ICP patients to report four novel SNPs. Only  
22 one of these is a missense mutation known as c.592A>C in CDS of *CLDN2* gene, making the  
23 amino acid change from Met to Leu. This patient was a girl who was diagnosed as ICP after  
24 several episodes of acute pancreatitis since she was 13 years old. All of these clinical  
25 characteristics showed no deviances from other patients. Claudin-2 encoded by *CLDN2* is  
26 normally expressed at low levels in the tight junction between cells of the pancreatic ducts  
27 and in pancreatic islets. But when stressed, acinar cells can also express claudin-2, proved by  
28 porcine models of acute pancreatitis<sup>35</sup>. Besides, the *CLDN2* promoter includes a nuclear  
29 factor (NF)-κB-binding site<sup>36</sup>, and *CLDN2* expression is enhanced in other cells under  
30 conditions associated with injury and stress.  
31  
32  
33  
34  
35  
36  
37  
38  
39  
40  
41  
42  
43  
44  
45  
46

47 In an attempt to associate these mutations with clinical parameters from these ICP  
48 patients, we did not observe any association between the gene mutations and an earlier age of  
49 CP diagnosis, which is contrary to a previous study<sup>37</sup>. However, showed that patients with  
50 IVS3+2T>C mutation were more likely to have pancreatic duct stones or pancreatic  
51 calcification than those without such a mutation. It has been well known that patients with  
52 pancreatic calcification are more severe than those without pancreatic calcification.  
53  
54  
55  
56  
57  
58  
59  
60



1  
2  
3 Therefore, our observations, along with previous findings <sup>27</sup> suggest that a IVS3+2T>C  
4 mutation in *SPINK1* predisposes to more severity of CP. Moreover, CP patients have a  
5 markedly increased risk in developing pancreatic cancer compared to the general population  
6  
7  
8  
9 <sup>14, 15</sup> and *PRSSI* or *SPINK1* mutation may be a predictor for pancreatic cancer development in  
10 CP patients. The IVS3+2T>C mutation was present in 0.6% of the sporadic pancreatic cancer  
11 patients. Thus, CP patients with *PRSSI* or *SPINK1* mutation should avoid any risk factors,  
12 including alcohol and tobacco, be monitored for any signs or symptoms (pain, weight loss,  
13 jaundice, and/or abdominal mass) or with serum markers and imaging examination for  
14 pancreatic cancer.  
15  
16  
17  
18  
19  
20  
21

22 CNVs often occur in human cancers and the compositions of CNVs may contain  
23 deletion, amplification, deletion plus amplification, multiple alleles and complicated locus.  
24 Lafrate and Sebat were the first to respectively report CNVs in human genome in 2004 <sup>38</sup>. To  
25 date, many studies proved that both CNVs and SNP can affect gene expressions. However,  
26 the effect of *PRSSI* gene CNVs on ICP has not been fully studied.  
27  
28  
29  
30  
31  
32  
33

### 34 **Acknowledgements**

35  
36 We thank *Medjaden* Bioscience Limited, Hong Kong, China, for assistance in  
37 preparation of this manuscript.  
38  
39  
40  
41

### 42 **Contributorship statement**

43  
44 Prof. Zhuan Liao and Zhao-Shen Li conceived the project. Dr. Xiao-Tian Sun, Wei  
45 Wang, Xiao-Ling Weng, and Dai-Zhan Zhou completed the DNA isolation, PCR analyses of  
46 gene mutations, and detection of gene copy number variations (CNVs). Dr. Chang Sun, Tian  
47 Xia, Liang-Hao Hu, Xiao-Wei Lai, Bo Ye, Mu-Yun Liu, Fei Jiang, and Jun Gao collected the  
48 peripheral blood samples and clinical data. Lu-Min Bo and Yun Liu completed the statistical  
49 analyses.  
50  
51  
52  
53  
54  
55  
56  
57  
58  
59  
60



## Funding

This work was supported by grants from the National Natural Science Foundation of China (No.81270541, to L.Z.), Shanghai Rising-Star Program (No.13QA1404600, to L.Z.), Outstanding Young Scholars Fund of Second Military Medical University (to L.Z.), and Disciplinary Joint Research Projects of Changhai Hospital (No.CH125510312, to L.Z.)

## Competing Interests

None

## Data sharing

No additional data available.

## References

1. Keller J, Lamer P. Idiopathic chronic pancreatitis. *Best Pract Res Clin Gastroenterol* 2008;22:105-113.
2. Wang W, Liao Z, Li ZS, et al. Chronic pancreatitis in Chinese children: Etiology, clinical presentation and imaging diagnosis. *J Gastroenterol Hepatol* 2009;24:1862-1868.
3. Witt H, Luck W, Hennies HC, et al. Mutations in the gene encoding the serine protease inhibitor, Kazal type 1 are associated with chronic pancreatitis. *Nat Genet* 2000;25:213-216.
4. Chen JM, Férec C. Genetics and pathogenesis of chronic pancreatitis: the 2012 update. *Clin Res Hepatol Gastroenterol* 2012;36:334-40.
5. Whitcomb DC, Gorry MC, Peston RA, et al. Hereditary pancreatitis is caused by a mutations in the cationic trypsinogen. *Nat Genet* 1996;14:141-145.
6. Sharer N, Schwarz M, Malone G, et al. Mutations of the cystic fibrosis gene in patients with chronic pancreatitis. *N Engl J Med* 1998;339:645-652.
7. Rosendahl J, Witt H, Szmola R, et al. Chymotrypsin C (CTRC) mutations that diminish activity or secretion are associated with chronic pancreatitis. *Nat Genet* 2008;40:78-82.
8. Whitcomb DC, LaRusch J, Krasinskas AM, et al. Common genetic variants in the CLDN2 and PRSS1-PRSS2 loci alter risk for alcohol-related and sporadic pancreatitis. *Nat Genet* 2012;44:1349-54.
9. Witt H, Apte MV, Keim V, et al. Chronic pancreatitis: challenges and advances in pathogenesis, genetics, diagnosis, and therapy. *Gastroenterology* 2007;132:1557-1573.

10. Treiber M, Schlag C, Schmid RM. Genetics of pancreatitis: a guide for clinicians. *Curr Gastroenterol Rep* 2008;10:122-127.
11. Truninger K, Witt H, Kock J, et al. Mutations of the serine protease inhibitor, Kazal type 1 gene, in patients with idiopathic chronic pancreatitis. *Am J Gastroenterol* 2002;97:1133-1137.
12. Pfutzer RH, Barmada MM, Brunskil AP, et al. *SPINK1*/PSTI polymorphisms act as disease modifiers in familial and idiopathic chronic pancreatitis. *Gastroenterology* 2000;119:615-623.
13. Chang YT, Wei SC, L PC, et al. Association and differential role of *PRSSI* and *SPINK1* mutations in early-onset and late-onset idiopathic chronic pancreatitis in Chinese subjects. *Gut* 2009;58:885.
14. Rebours V, Boutron-Ruault MC, Schnee M, et al. The natural history of hereditary pancreatitis: a national series. *Gut* 2009;58:97-103.
15. Wang LW, Li ZS, Li SD, et al. Prevalence and clinical features of chronic pancreatitis in China: A retrospective multicenter analysis over 10 years. *Pancreas* 2009;38:248-254.
16. Chang MC, Chang YT, Wei SC, et al. Association of Novel Chymotrypsin C Gene Variations and Haplotypes in Patients with Chronic Pancreatitis in Chinese in Taiwan. *Pancreatology* 2009;9:287-292.
17. Tandon RK, Sato N, Garg PK, Consensus Study Group. Chronic pancreatitis: Asia-Pacific consensus report. *J Gastroenterol Hepatol* 2002;17:508-518.
18. Axon AT, Classen M, Cotton PB. Pancreatography in chronic pancreatitis: International definitions. *Gut* 1984;25:1107-1112.
19. Witt H, Sahin-Tóth M, Landt O, et al. A degradation-sensitive anionic trypsinogen (*PRSS2*) variant protects against chronic pancreatitis. *Nat Genet* 2006;38:668-673.
20. Witt H, Luck W, Becker M. A signal peptide cleavage site mutations in the cationic trypsinogen is strongly associated with chronic pancreatitis. *Gastroenterology* 1999;117:7-10.
21. Witt H. Gene mutations in children with chronic pancreatitis. *Pancreatology* 2001;1:432-438.
22. Truninger K, Kock J, Wirth HP, et al. Trypsinogen gene mutations in patients with chronic or recurrent acute pancreatitis. *Pancreas* 2001;22:18-23.
23. Sobczynska-Tomaszewska A, Bak D, Oralewska B, et al. Analysis of *CFTR*, *SPINK1*, *PRSSI* and *AAT* mutations in children with acute or chronic pancreatitis. *J Pediatr Gastroenterol Nutr* 2006;43:299-306.

- 1
  - 2
  - 3
  - 4
  - 5
  - 6
  - 7
  - 8
  - 9
  - 10
  - 11
  - 12
  - 13
  - 14
  - 15
  - 16
  - 17
  - 18
  - 19
  - 20
  - 21
  - 22
  - 23
  - 24
  - 25
  - 26
  - 27
  - 28
  - 29
  - 30
  - 31
  - 32
  - 33
  - 34
  - 35
  - 36
  - 37
  - 38
  - 39
  - 40
  - 41
  - 42
  - 43
  - 44
  - 45
  - 46
  - 47
  - 48
  - 49
  - 50
  - 51
  - 52
  - 53
  - 54
  - 55
  - 56
  - 57
  - 58
  - 59
  - 60
24. Nishimori I, Kamakura M, Fujikawa-Adachi K, et al. Mutations in exons 2 and 3 of the cationic trypsinogen gene in Japanese families with hereditary pancreatitis. *Gut* 1999;44:259-263.
25. Oh HC, Kim MH, Choi KS, et al. Analysis of *PRSSI* and *SPINK1* mutations in Korean patients with idiopathic and familial pancreatitis. *Pancreas* 2009;38:180-183.
26. Teich N, Rosendahl J, Toth M, et al. Mutations of human cationic trypsinogen (*PRSSI*) and chronic pancreatitis. *Hum Mutat* 2006, 27: 721-730.
27. Kume K, Masamune A, Kikuta K, et al. [-215G>A; IVS3+2T>C] mutation in the *SPINK1* gene causes exon 3 skipping and loss of the trypsin binding site. *Gut* 2006;55:1214.
28. Kalinin VN, Kaifi JT, Schwarzenbach H, et al. Association of rare *SPINK1* gene mutation with another base substitution in chronic pancreatitis patients. *World J Gastroenterol* 2006;12:5352-5356.
29. Huang Q, Ding W, Wei MX. Comparative analysis of common *CFTR* polymorphisms poly-T, TG-repeats and M470V in a healthy Chinese population. *World J Gastroenterol* 2008;14:1925-30.
30. Nam MH, Hijikata M, Tuan le A, et al. Variations of the *CFTR* gene in the Hanoi-Vietnamese. *Am J Med Genet A* 2005;136:249-53.
31. Fujiki K, Ishiguro H, Ko SB, et al. Genetic evidence for *CFTR* dysfunction in Japanese: background for chronic pancreatitis. *J Med Genet* 2004; 41:e55.
32. Schneider A, Larusch J, Sun X, et al. Combined bicarbonate conductance-impairing variants in *CFTR* and *SPINK1* variants are associated with chronic pancreatitis in patients without cystic fibrosis. *Gastroenterology* 2011;140:162-71.
33. Chee Y, Ooi, Peter R. Cystic fibrosis transmembrane conductance regulator (*CFTR*) gene mutations in pancreatitis. *Journal of Cystic Fibrosis* 2012;11:355-62.
34. Zhou J, Sahin-Tóth M. Chymotrypsin C mutations in chronic pancreatitis. *J Gastroenterol Hepatol* 2011;26:1238-46.
35. Lee JH, Kim KS, Kim TJ, et al. Immunohistochemical analysis of claudin expression in pancreatic cystic tumors. *Oncol. Rep* 2011;25:971-78.
36. Sakaguchi T, Gu X, Golden HM, et al. Cloning of the human claudin-2 5'-flanking region revealed a TATA-less promoter with conserved binding sites in mouse and human for caudal-related homeodomain proteins and hepatocyte nuclear factor-1alpha. *J Biol Chem.* 2002;277:21361-70.
37. Howes N, Lerch MM, Greenhalf W, et al. Clinical and genetic characteristics of hereditary pancreatitis in Europe. *Clin Gastroenterol Hepatol* 2004;2:252-261.

1  
2  
3  
4  
5  
6  
7  
8  
9  
10  
11  
12  
13  
14  
15  
16  
17  
18  
19  
20  
21  
22  
23  
24  
25  
26  
27  
28  
29  
30  
31  
32  
33  
34  
35  
36  
37  
38  
39  
40  
41  
42  
43  
44  
45  
46  
47  
48  
49  
50  
51  
52  
53  
54  
55  
56  
57  
58  
59  
60

38. Sebat J, Lakshmi B, Troge J, et al. Large-scale copy number polymorphism in the human genome. *Science* 2004;305:525-528.

For peer review only

Table 1 Characteristics of the ICP study participants

|                                        |              |
|----------------------------------------|--------------|
| Age, median (range), years             | 11.91 (3-18) |
| Sex, n (%)                             |              |
| Female                                 | 35           |
| Male                                   | 40           |
| Clinical symptoms, n (%)               |              |
| Acute pancreatitis                     | 61           |
| Pure abdominal pain                    | 13           |
| Weight loss                            | 3            |
| Diarrhea                               | 1            |
| High blood glucose                     | 1            |
| Other                                  | 0            |
| Imaging examination (CT, MRCP or ERCP) |              |
| Pancreatic duct stenosis or dilation   | 57           |
| Pancreatic duct stones                 | 45           |
| Pancreatic pseudocyst                  | 15           |
| Pancreatic calcification               | 15           |
| Other                                  | 4*           |
| Laboratory tests                       |              |
| Increased CA199                        | 6            |
| Increased blood cholesterol            | 6            |
| Increased blood glucose                | 2            |
| Decreased blood calcium                | 2            |

\* Pancreatic Divisum

Table 2 *PRSSI*, *SPINK1*, *CFTR* and *CTRC* gene mutations in the ICP patients

| Gene mutations       | Region  | Functional class | Positive, n (%) |
|----------------------|---------|------------------|-----------------|
| <b><i>PRSSI</i></b>  |         |                  |                 |
| A16V                 | Exon 2  | Missense         | 0               |
| N29I                 | Exon 2  | Missense         | 1 (1.3)         |
| E79K                 | Exon 3  | Missense         | 0               |
| R116C                | Exon 3  | Missense         | 0               |
| A121T                | Exon 3  | Missense         | 0               |
| R122H or R122C       | Exon 3  | Missense         | 6 (8.0)*        |
| <b><i>SPINK1</i></b> |         |                  |                 |
| N34S                 | Exon 3  | Missense         | 0               |
| IVS3+2T>C            | IVS 3   | Splicing         | 43 (57.3)**     |
| <b><i>CFTR</i></b>   |         |                  |                 |
| R117H                | Exon 4  | Missense         | 0***            |
| F508del              | Exon 11 | Del              | 0               |
| c.2562T>G            | Exon 15 | Nonsense         | 51 (68.0)****   |
| c.4389G>A            | Exon 27 | Nonsense         | 1 (1.3)         |
| <b><i>CTRC</i></b>   |         |                  |                 |
| c.143A>G             | Exon 3  | Missense         | 0               |
| c.180C>T             | Exon 3  | Nonsense         | 0               |
| c.217G>A             | Exon 3  | Missense         | 0               |

|                |        |          |   |
|----------------|--------|----------|---|
| c.703G>A       | Exon 7 | Missense | 0 |
| c.760C>T       | Exon 7 | Missense | 0 |
| p.K247_R254del | Exon 7 | Del      | 0 |

**CLDN2**

|          |        |          |    |
|----------|--------|----------|----|
| c.22G>A  | Exon 1 | Nonsense | 2  |
| c.327A>T | Exon 2 | Nonsense | 1  |
| c.592A>C | Exon 2 | Missense | 1  |
| c.768T>C | Exon 2 | Nonsense | 22 |

---

\* one was c.364 C>T and other five were c.365 G>A

\*\* 33 were heterozygous and 10 were homozygous

\*\*\* one patient has the deletions of GCTTCCTA from c.500 to c.508

\*\*\*\* 37 were heterozygous and 14 were homozygous

Table 3 Association of gene mutation (IVS3+2T&gt;C, M470V and c.2562T&gt;G) with clinicopathological data from the 75 patients

| Mutations |     | Age at diagnosis |     |                |       | Pancreatic duct stenosis<br>or dilation |    |                |       | Pancreatic duct stones |    |                |       | Pancreatic pseudocyst |    |                |       | Pancreatic calcification |    |                |       |
|-----------|-----|------------------|-----|----------------|-------|-----------------------------------------|----|----------------|-------|------------------------|----|----------------|-------|-----------------------|----|----------------|-------|--------------------------|----|----------------|-------|
|           |     | <12              | ≥12 | X <sup>2</sup> | P     | Yes                                     | No | X <sup>2</sup> | P     | Yes                    | No | X <sup>2</sup> | P     | Yes                   | No | X <sup>2</sup> | P     | Yes                      | No | X <sup>2</sup> | P     |
|           |     | value            |     |                |       | value                                   |    |                |       | value                  |    |                |       | value                 |    |                |       |                          |    |                |       |
| IVS3+2T>C | Yes | 17               | 26  | 0.815          | 0.367 | 34                                      | 9  | 0.521          | 0.471 | 30                     | 13 | 4.006          | 0.045 | 5                     | 38 | 4.415          | 0.036 | 12                       | 31 | 3.938          | 0.047 |
|           | No  | 16               | 16  |                |       | 23                                      | 9  |                |       | 15                     | 17 |                |       | 10                    | 22 |                |       | 3                        | 29 |                |       |
| M470V     | MM  | 18               | 23  | 0.199          | 0.905 | 32                                      | 9  | 0.305          | 0.859 | 25                     | 16 | 0.773          | 0.679 | 9                     | 32 | 1.566          | 0.457 | 11                       | 30 | 2.664          | 0.264 |
|           | MV  | 5                | 5   |                |       | 7                                       | 3  |                |       | 7                      | 3  |                |       | 3                     | 7  |                |       | 1                        | 9  |                |       |
|           | VV  | 10               | 14  |                |       | 18                                      | 6  |                |       | 13                     | 11 |                |       | 3                     | 21 |                |       | 3                        | 21 |                |       |
| c.2562T>G | Yes | 23               | 28  | 0.078          | 0.780 | 39                                      | 12 | 0.019          | 0.899 | 32                     | 19 | 0.500          | 0.479 | 12                    | 39 | 1.241          | 0.265 | 12                       | 39 | 1.241          | 0.265 |
|           | No  | 10               | 14  |                |       | 18                                      | 6  |                |       | 13                     | 11 |                |       | 3                     | 21 |                |       | 3                        | 21 |                |       |



1  
2  
3  
4  
5  
6  
7  
8  
9  
10  
11  
12  
13  
14  
15  
16  
17  
18  
19  
20  
21  
22  
23  
24  
25  
26  
27  
28  
29  
30  
31  
32  
33  
34  
35  
36  
37  
38  
39  
40  
41  
42  
43  
44  
45  
46  
47  
48  
49  
50  
51  
52  
53  
54  
55  
56  
57  
58  
59  
60

For peer review only

1  
2  
3  
4  
5  
6  
7  
8  
9  
10  
11  
12  
13  
14  
15  
16  
17  
18  
19  
20  
21  
22  
23  
24  
25  
26  
27  
28  
29  
30  
31  
32  
33  
34  
35  
36  
37  
38  
39  
40  
41  
42  
43  
44  
45  
46  
47  
48  
49  
50  
51  
52  
53  
54  
55  
56  
57  
58  
59  
60

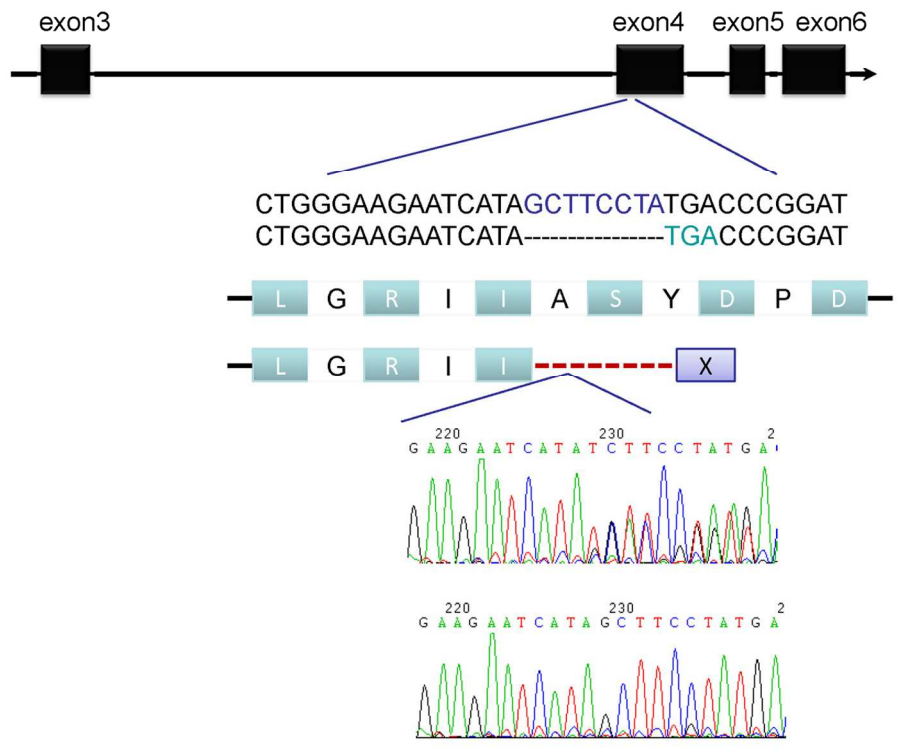

Figure 1. A Novel CFTR gene deletion detected using DNA sequence of PCR products.  
129x106mm (300 x 300 DPI)

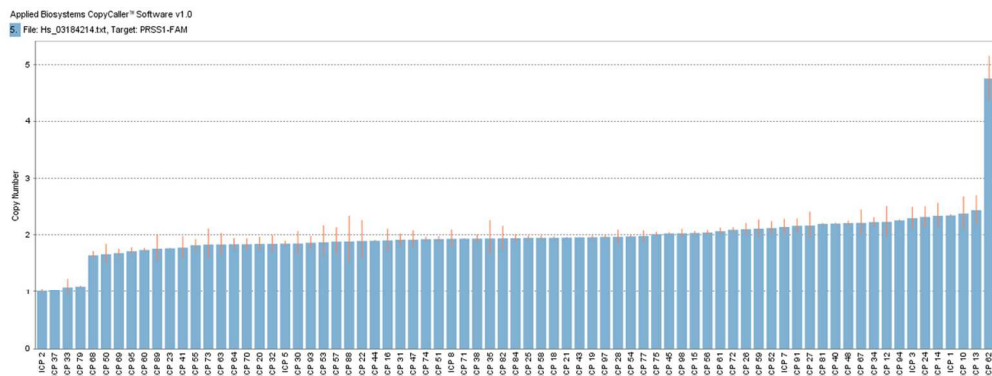

Figure 2. Copy number variations (Hs03184214\_cn) of PRSS1 gene in 75 Chinese ICP patients. 119x45mm (300 x 300 DPI)

Peer review only

Supplemental Table 1. PCP primers used to detect *PRSSI*, *SPINK1*, *CFTR*, *CTRC* and *CLDN2* gene mutations

| Gene                         | Primers                                                          |
|------------------------------|------------------------------------------------------------------|
| <i>PRSSI</i>                 |                                                                  |
| A16V, N29I                   | 5'-cagagacttgggagccaca-3'<br>5'-accacaacccttgggttttc-3'          |
| E79K, R116C,<br>A121T, R122H | 5'-acctcactgaccacatcc-3'<br>5'-agccaagtccttgatagtttc-3'          |
| <i>SPINK1</i>                |                                                                  |
| N34S                         | 5'-aaggtttctgtctccagatagtagg-3'<br>5'-ccaagctatcgactattttgctg-3' |
| IVS3+2T>C                    | 5'-agatgtggccaacctgagag-3'<br>5'-gcttttctcggggtgagatt-3'         |
| <i>CFTR</i>                  |                                                                  |
| R117H                        | 5'-aaactgtctcccactgttgc-3'<br>5'-caacagaggcagtttacagaaga-3'      |
| 1210TG/T                     | 5'-ggccatgtgcttttcaaacta-3'<br>5'-cgccaacaactgtcctcttt-3'        |

---

|                |                               |
|----------------|-------------------------------|
| M470V          | 5'-caagtgaatcctgagcgtga-3'    |
|                | 5'-tgctttgatgacgcttctgt-3'    |
| F508del        | 5'-cccttgatcttttgcatagc-3'    |
|                | 5'-gcttctaaagcataggcattgtg-3' |
| c.2562T>G      | 5'-acaatggtggcatgaaactg-3'    |
|                | 5'-gccttctactttgagctttcg-3'   |
| c.4389G>A      | 5'-cgacagggtgaagctctttc-3'    |
|                | 5'-tctggcttgcaaacacaag-3'     |
| <i>CTRC</i>    |                               |
| c.143A>G       | , 5'-gtgtagggctgggaggtaca-3'  |
| c.180C>T       | ,                             |
| c.217G>A       |                               |
|                | 5'-ttcccgagagcacagacttt-3'    |
| c.703G>A       | , 5'-cagttggagaacggttctg-3'   |
| c.760C>T       | ,                             |
| c.738_761del24 |                               |
|                | 5'-gtgcttgatgaaggcagtga-3'    |
| <i>CLDN2</i>   |                               |
| Exon 1         | 5'-ctgccaacacagtctcctca-3'    |
|                | 5'-ggattgttgcttagggtga-3'     |
| Exon 2         | 5'-gtcagcctggcagagagact-3'    |
|                | 5'-ctgtgtgtggcacattccat-3'    |

---

1  
2  
3  
4  
5  
6  
7  
8  
9  
10  
11  
12  
13  
14  
15  
16  
17  
18  
19  
20  
21  
22  
23  
24  
25  
26  
27  
28  
29  
30  
31  
32  
33  
34  
35  
36  
37  
38  
39  
40  
41  
42  
43  
44  
45  
46  
47  
48  
49  
50  
51  
52  
53  
54  
55  
56  
57  
58  
59  
60

---

5'-ttgtgacagcagttggcttc-3'

5'-caagaggtgggcttgtag-3'

5'-cctgggattcattcctgttg-3'

5'-tccagtgtagtgcctca-3'

---

For peer review only

Supplemental Table 2. Probe used to screen *PRSS-1* CNVs

|                |                                 |
|----------------|---------------------------------|
| Probe          | Hs03184214_cn                   |
| Assay Location | Chr7:142460752 on NCBI build 37 |
| Cytoband       | 7q34f                           |
| Species        | H. sapiens                      |
| Variation Type | Copy Number                     |

Supplemental Table 3. TG-repeats and poly-T tract polymorphism in the junction of intron 8 (IVS-8) and exon 9 of *CFTR*

| Total<br>(n) | Number   | Number (frequencies) of individuals with genotypes |           |            |           |
|--------------|----------|----------------------------------------------------|-----------|------------|-----------|
|              |          | (TG)10-T7                                          | (TG)11-T7 | (TG)12-T5  | (TG)12-T7 |
| 75 (100%)    | 2 (2.7%) | 55 (73.3%)                                         | 5 (6.7%)  | 13 (17.3%) |           |



Supplemental Table 4. M470V polymorphism at exon 10 of *CFTR*

| Total<br>Number<br>(n) | Number (frequencies) of individuals<br>with genotypes |           |         | Number (frequencies) of<br>individuals with alleles |           |
|------------------------|-------------------------------------------------------|-----------|---------|-----------------------------------------------------|-----------|
|                        | MM                                                    | MV        | VV      | M                                                   | V         |
| 75(100%)               | 10(13.3%)                                             | 41(54.7%) | 24(32%) | 61(40.7%)                                           | 89(59.3%) |

Supplemental Figure 1. Representative illustrations of mutations detected in 75 patients with idiopathic chronic pancreatitis.

A, Representatives of exon 3 in *PRSS1* gene in patients without mutation (top), patients with heterozygous R122C mutation (middle) and patients with heterozygous p.R122H mutation (bottom). *R122C* and *R122H* mutations are reflected by C→T and G→A transitions, respectively, at codon 122 that result in an arginine to cysteine and histidine substitution at amino acid 122, respectively.

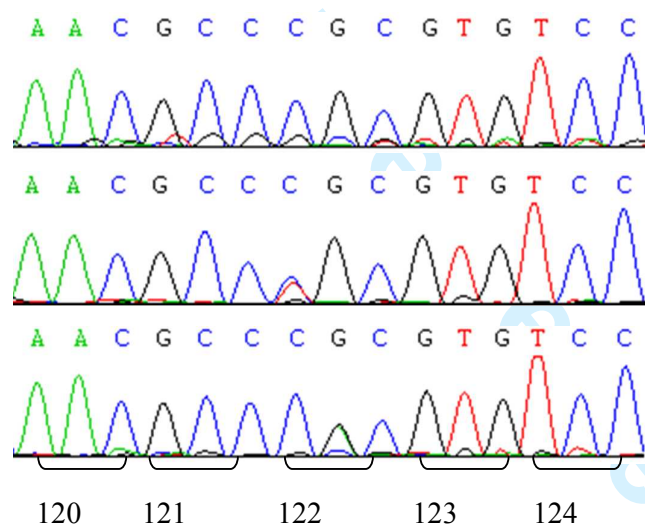

Arg: C G C

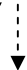

Cys: T G C

His: C A C

1  
2  
3  
4 B, Representatives of *PRSSI* gene exon 2 in patients without mutation (top), patients  
5  
6 with heterozygous N29I (bottom) mutations. N29I mutation is reflected by A→T  
7  
8 transition at codon 29 that results in an asparagine to isoleucine substitution at amino  
9  
10 acid 29.  
11  
12

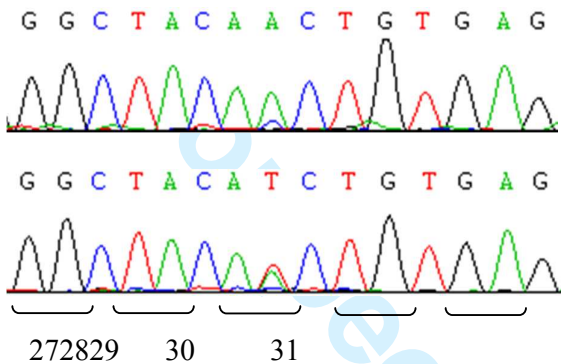

Asp: A A C

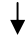

Ile : A T C

1  
2  
3  
4 C, Representatives of the nucleotide sequences in *SPINK1* gene promoter region in patients  
5  
6 without mutation (top), patients with homozygous IVS3+2T>C mutation (middle) and those  
7  
8 with heterozygous IVS3+2T>C mutation (bottom). IVS3+2T>C mutation is reflected by C  
9  
10 residue, instead of T, at nucleotide 2 downstream from the end point of exon 3 (right).  
11  
12

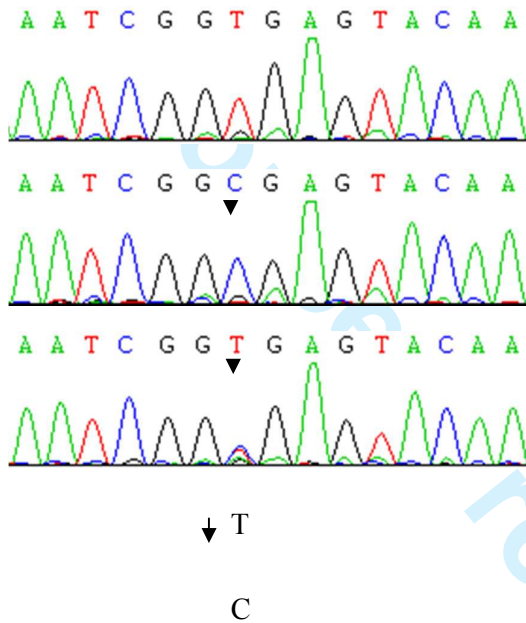

1  
2  
3  
4 D, Representatives of *CFTR* gene exon 10 mutation in patients without mutation (top),  
5  
6 patients with heterozygous M470V mutation (middle) and patients with  
7  
8 homozygous M470V mutation (bottom). This mutation is reflected by G→A transition,  
9  
10 at codon 470 that results in a valine to methionine substitution at amino acid 470 (an  
11  
12 anti-sense sequence).  
13  
14

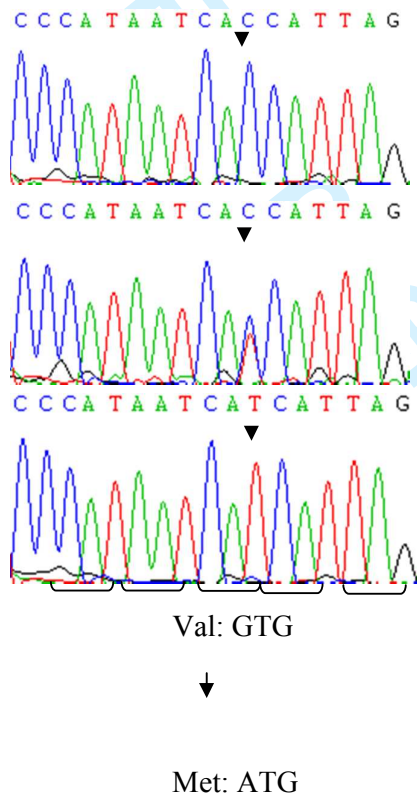

1  
2  
3  
4  
5  
6  
7  
8  
9  
10  
11  
12  
13  
14  
15  
16  
17  
18  
19  
20  
21  
22  
23  
24  
25  
26  
27  
28  
29  
30  
31  
32  
33  
34  
35  
36  
37  
38  
39  
40  
41  
42  
43  
44  
45  
46  
47  
48  
49  
50  
51  
52  
53  
54  
55  
56  
57  
58  
59  
60

E, Representatives of *CFTR* gene exon 27 mutation in patients without mutation (top), patients with heterozygous c.4389G>A mutation (bottom). This mutation is reflected by G→A transition, at codon 1463 that is nonsense one (an anti-sense sequence).

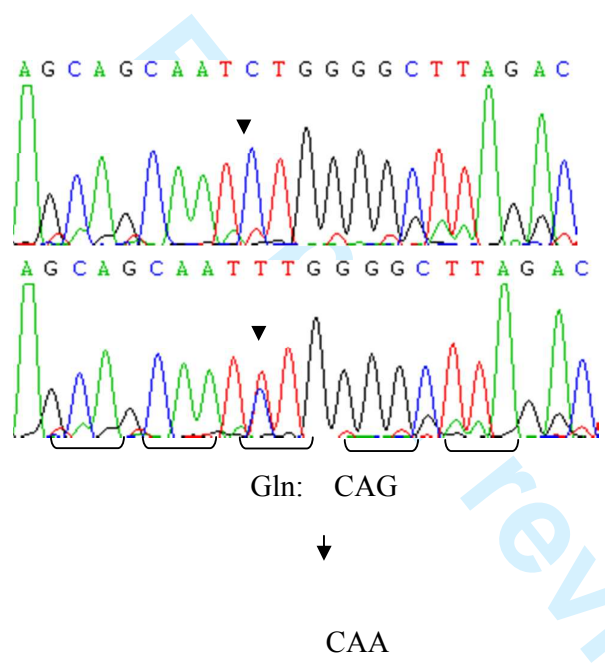

review only

1  
2  
3  
4 F, Representatives of *CFTR* gene exon 15 mutation in patients without mutation (top),  
5  
6 patients with heterozygous c.2562T>G mutation (middle) and patients with  
7  
8 homozygous c.2562T>G mutation (bottom). This mutation is reflected by T→G  
9  
10 transition, at codon 854 that is nonsense one.  
11  
12

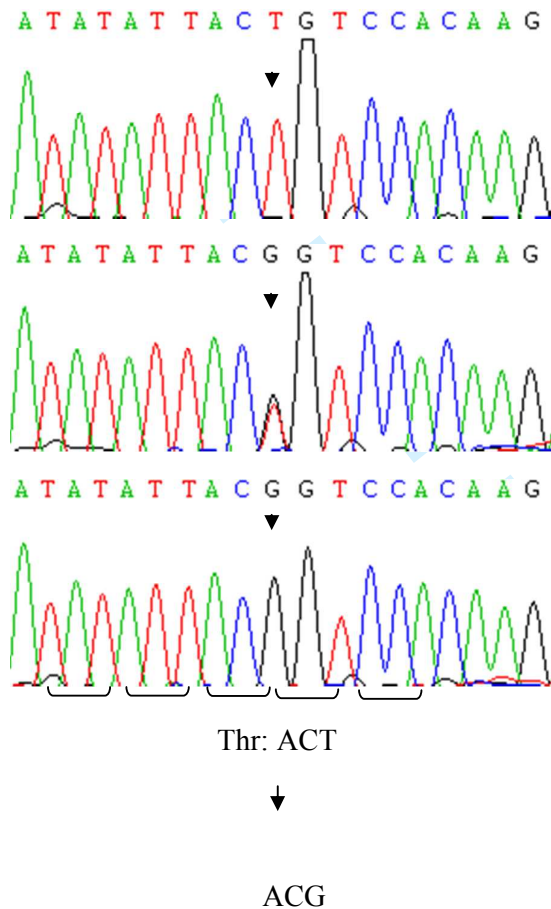

1  
2  
3  
4  
5  
6  
7  
8  
9  
10  
11  
12  
13  
14  
15  
16  
17  
18  
19  
20  
21  
22  
23  
24  
25  
26  
27  
28  
29  
30  
31  
32  
33  
34  
35  
36  
37  
38  
39  
40  
41  
42  
43  
44  
45  
46  
47  
48  
49  
50  
51  
52  
53  
54  
55  
56  
57  
58  
59  
60

G, Representatives of *CLDN2* gene exon 2 mutation in patients without mutation (top), patients with heterozygous mutation (bottom). This mutation is reflected by A→C transition that is missense.

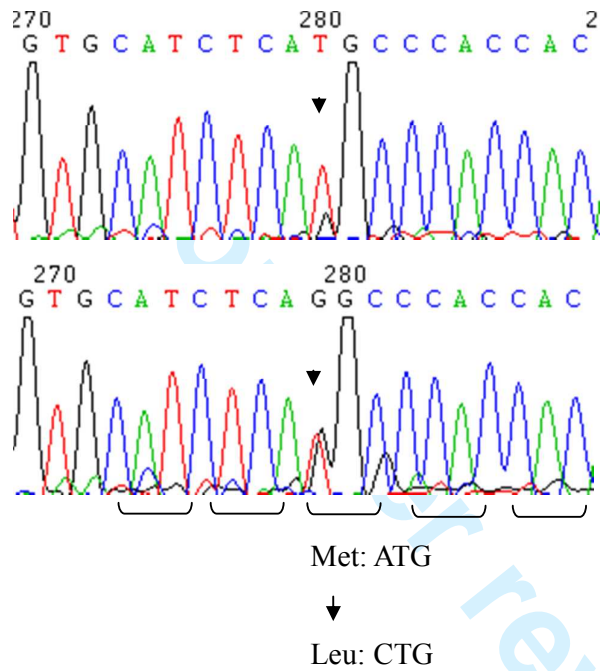



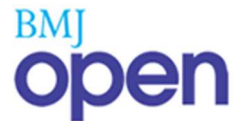

**Comprehensive Screening for PRSS1, SPINK1, CFTR, CTRC  
and CLDN2 Gene Mutations in Chinese Pediatric Patients  
with Idiopathic Chronic Pancreatitis**

|                                 |                                                                                                                                                                                                                                                                                                                                                                                                                                                                                                                                                                                                                                                                                                                                                                                                                                                                                                                                                                                                                                                                                                                                                                                                                                                                              |
|---------------------------------|------------------------------------------------------------------------------------------------------------------------------------------------------------------------------------------------------------------------------------------------------------------------------------------------------------------------------------------------------------------------------------------------------------------------------------------------------------------------------------------------------------------------------------------------------------------------------------------------------------------------------------------------------------------------------------------------------------------------------------------------------------------------------------------------------------------------------------------------------------------------------------------------------------------------------------------------------------------------------------------------------------------------------------------------------------------------------------------------------------------------------------------------------------------------------------------------------------------------------------------------------------------------------|
| Journal:                        | <i>BMJ Open</i>                                                                                                                                                                                                                                                                                                                                                                                                                                                                                                                                                                                                                                                                                                                                                                                                                                                                                                                                                                                                                                                                                                                                                                                                                                                              |
| Manuscript ID:                  | bmjopen-2013-003150.R1                                                                                                                                                                                                                                                                                                                                                                                                                                                                                                                                                                                                                                                                                                                                                                                                                                                                                                                                                                                                                                                                                                                                                                                                                                                       |
| Article Type:                   | Research                                                                                                                                                                                                                                                                                                                                                                                                                                                                                                                                                                                                                                                                                                                                                                                                                                                                                                                                                                                                                                                                                                                                                                                                                                                                     |
| Date Submitted by the Author:   | 24-Jul-2013                                                                                                                                                                                                                                                                                                                                                                                                                                                                                                                                                                                                                                                                                                                                                                                                                                                                                                                                                                                                                                                                                                                                                                                                                                                                  |
| Complete List of Authors:       | <p>Wang, Wei; Changhai Hospital, Gastroenterology<br/>           Sun, Xiao-Tian; Changhai Hospital, Gastroenterology<br/>           Weng, Xiao-Ling; Bio-X Institutes, Shanghai Jiao Tong University, Key Laboratory of Developmental Genetics and Neuropsychiatric Diseases (Ministry of Education)<br/>           Zhou, Dai-Zhan; Bio-X Institutes, Shanghai Jiao Tong University, Key Laboratory of Developmental Genetics and Neuropsychiatric Diseases (Ministry of Education)<br/>           Sun, Chang; Changhai Hospital, Gastroenterology<br/>           Xia, Tian; Changhai Hospital, Gastroenterology<br/>           Hu, Liang-Hao; Changhai Hospital, Gastroenterology<br/>           Lai, Xiao-Wei; Changhai Hospital, Gastroenterology<br/>           Ye, Bo; Changhai Hospital, Gastroenterology<br/>           Liu, Mu-Yun; Changhai Hospital, Gastroenterology<br/>           Jiang, Fei; Changhai Hospital, Gastroenterology<br/>           Gao, Jun; Changhai Hospital, Gastroenterology<br/>           Bo, Lu-Min; Changhai Hospital, Gastroenterology<br/>           Liu, Yun; Changhai Hospital, Gastroenterology<br/>           Liao, Zhuan; Changhai Hospital, Gastroenterology<br/>           Li, Zhaoshen; Changhai Hospital, Gastroenterology</p> |
| <b>Primary Subject Heading</b>: | Gastroenterology and hepatology                                                                                                                                                                                                                                                                                                                                                                                                                                                                                                                                                                                                                                                                                                                                                                                                                                                                                                                                                                                                                                                                                                                                                                                                                                              |
| Secondary Subject Heading:      | Genetics and genomics                                                                                                                                                                                                                                                                                                                                                                                                                                                                                                                                                                                                                                                                                                                                                                                                                                                                                                                                                                                                                                                                                                                                                                                                                                                        |
| Keywords:                       | Paediatric gastroenterology < PAEDIATRICS, GASTROENTEROLOGY, GENETICS                                                                                                                                                                                                                                                                                                                                                                                                                                                                                                                                                                                                                                                                                                                                                                                                                                                                                                                                                                                                                                                                                                                                                                                                        |
|                                 |                                                                                                                                                                                                                                                                                                                                                                                                                                                                                                                                                                                                                                                                                                                                                                                                                                                                                                                                                                                                                                                                                                                                                                                                                                                                              |

SCHOLARONE™  
Manuscripts

1  
2  
3  
4  
5  
6  
7  
8  
9  
10  
11  
12  
13  
14  
15  
16  
17  
18  
19  
20  
21  
22  
23  
24  
25  
26  
27  
28  
29  
30  
31  
32

## Comprehensive Screening for *PRSS1*, *SPINK1*, *CFTR*, *CTRC* and *CLDN2* Gene Mutations in Chinese Pediatric Patients with Idiopathic Chronic Pancreatitis

Wei Wang <sup>1,\*</sup>, Xiao-Tian Sun <sup>1,\*</sup>, Xiao-Ling Weng <sup>2,\*</sup>, Dai-Zhan Zhou <sup>2,\*</sup>, Chang Sun <sup>1</sup>, Tian  
Xia <sup>1</sup>, Liang-Hao Hu <sup>1</sup>, Xiao-Wei Lai <sup>1</sup>, Bo Ye <sup>1</sup>, Mu-Yun Liu <sup>1</sup>, Fei Jiang <sup>1</sup>, Jun Gao <sup>1</sup>,  
Lu-Min Bo <sup>1</sup>, Yun Liu <sup>2</sup>, Zhuan Liao <sup>1,#</sup>, Zhao-Shen Li <sup>1,#</sup>

<sup>1</sup> Department of Gastroenterology, Changhai Hospital, The Second Military Medicine  
University, Shanghai, China

<sup>2</sup> Key Laboratory of Developmental Genetics and Neuropsychiatric Diseases (Ministry of  
Education), Bio-X Institutes, Shanghai Jiao Tong University, Shanghai, China

*\*These four authors contributed equally to this work.*

This work was supported by grants from the National Natural Science Foundation of China  
(No.81270541, to L.Z.; No. 81170332, to W.W), Shanghai Rising-Star Program  
(No.13QA1404600, to L.Z.), Outstanding Young Scholars Fund of Second Military Medical  
University (to L.Z.), and Disciplinary Joint Research Projects of Changhai Hospital  
(No.CH125510312, to L.Z.).

<sup>#</sup>*Corresponding author:* Prof. Zhao-Shen Li (Email: [zhaoshenli@hotmail.com](mailto:zhaoshenli@hotmail.com)), OR Zhuan  
Liao (Email: [liao.zhuan@gmail.com](mailto:liao.zhuan@gmail.com)), Department of Gastroenterology, Changhai Hospital,  
The Second Military Medical University, 168 Changhai Road, Shanghai, 200433, China. Tel.:  
+86-21-31161335; Fax: +86-21-55621735.

**Competing interest:** There is no conflict of interest to declare.

## Abstract

**Objective:** Genetic alterations may contribute to chronic pancreatitis (CP) in Chinese young patients. This study was designed to investigate mutations of cationic trypsinogen (*PRSSI*), pancreatic secretory trypsin inhibitor or serine protease inhibitor Kazal type 1 (*SPINK1*), cystic fibrosis transmembrane conductance regulator (*CFTR*), chymotrypsin C (*CTRC*), and *CLDN2* genes and the copy number variations (CNVs) of *PRSSI* and assess associations with the development of idiopathic CP (ICP) in Chinese children.

**Design:** Retrospective.

**Setting:** A single center.

**Participants:** Seventy-five ICP Chinese children (40 boys and 35 girls).

**Primary and secondary outcome measures:** Mutations of *PRSSI*, *SPINK1*, *CFTR*, *CTRC* and *CLDN2* genes and CNVs.

**Results:** Seven patients had heterozygous mutations in *PRSSI*, i.e. N29I (n=1), R122H or R122C (n=6). The CNVs of *PRSSI* in five patients had abnormal copies [1 copy (n=4), five copies (n=1)]. 43 patients had IVS3+2T>C (rs148954387) (10 homozygous and 33 heterozygous) in *SPINK1*. None of the *PRSSI* mutation patients carried a *SPINK1* mutation. Frequency of *PRSSI* and *SPINK1* mutations was 9.3% and 57.3%, respectively, with an overall frequency of 66.6% (50/75). In addition, one patient had a novel deletion of *CFTR* (GCTTCCTA from c.500 to c.508 leading to the shortened polypeptide molecule via a stop codon). Another patient had a novel missense in *CLDN2* exon 2 (c.592A>C mutation). Clinically, patients with *SPINK1* mutations had a higher rate of pancreatic duct stones, pancreatic pseudocyst, and pancreatic calcification than those without *SPINK1* mutations (P<0.05).

**Conclusions:** *SPINK1* mutations were more commonly associated with Chinese ICP children. *SPINK1* IVS3+2T>C mutation may play an important role in the pathogenesis of Chinese pediatric ICP. However, further study is needed to confirm and to investigate the role of these genes in the development of Chinese ICP.

**Key words:** idiopathic chronic pancreatitis, *PRSSI*, *SPINK1*, *CFTR*, *CTRC*, *CLDN2*, CNVs,

1  
2  
3 children  
4  
5  
6  
7

## 8 **Summary Box**

### 10 Article focus

- 14 • Genetic alterations may contribute to chronic pancreatitis in Chinese young patients.
- 17 • China is different from the Western countries in regards to ethnic and cultural  
18 backgrounds, socioeconomic status, climatic conditions, and dietary habits.

### 23 Key messages

- 26 • SPINK1 IVS3+2T>C mutation was more commonly associated with Chinese ICP  
29 children.
- 32 • Pediatric patients with SPINK1 IVS3+2T>C mutation had a higher rate of pancreatic  
34 duct stones, pancreatic pseudocyst, and pancreatic calcification than those without.
- 37 • SPINK1 IVS3+2T>C mutation may play an important role in the pathogenesis of  
40 Chinese pediatric ICP, which may show some insights into a novel target for therapy.

### 44 Strengths and limitations

- 46 • To the best of our knowledge, this is the first study to determine the spectrum and  
48 frequency of PRSS1, SPINK1, CFTR, CTRC and CLDN2 gene mutations and  
50 PRSS1 CNVs in unrelated CP children in China.
- 53 • Further study is needed to confirm and to investigate the role of these genes in the  
54 development of Chinese ICP.

## • Introduction

Chronic pancreatitis is an inflammatory disease characterized by irreversible destruction of the pancreatic normal structure and function and is associated with persistent abdominal pain or steatorrhea. In adults, alcohol abuse is an important cause of chronic pancreatitis, while other factors (such as anatomical changes, metabolic disease, trauma and heredity) may also cause or associate with chronic pancreatitis. However, up to 10-25% of patients with chronic pancreatitis have no clear risk factors and these patients are classified as having idiopathic chronic pancreatitis (ICP)<sup>1</sup>. In children, it is estimated that ICP accounts for approximately 40-60% of all children with chronic pancreatitis in Western countries, but the reported rate was as high as 73.8% in China<sup>2</sup>. The pathogenesis of ICP, especially in children, remains poorly understood. Since the conventional risk factors such as alcohol abuse are uncommon in children, it has reported that environmental risk factors may play a limited role in the pathogenesis of ICP in children; thus, patients with ICP at these ages are thought to be suitable for studies of genetic defects<sup>3</sup>.

Over the last two decades, genetic factors have been shown in patients with chronic pancreatitis and these factors are believed to play an important role in the pathogenesis of chronic pancreatitis<sup>4</sup>. For example, previous studies reported identification of mutations in genes encoding cationic trypsinogen (UniGene name: protease serine 1: *PRSSI*) (OMIM 276000)<sup>5</sup>, cystic fibrosis transmembrane conductance regulator (*CFTR*) (OMIM 602421)<sup>6</sup>, the pancreatic secretory trypsin inhibitor or serine protease inhibitor Kazal type 1 (PSTI or *SPINK1*) (OMIM 167790)<sup>3</sup>, and chymotrypsin C (*CTRC*) (OMIM 601405)<sup>7</sup>, all of which reveal that hereditary pancreatitis is a more common form of chronic pancreatitis than once thought<sup>1</sup>. More recently, a newly detected candidate gene known as *CLDN2* has been shown to be associated with sporadic and alcohol-related chronic pancreatitis<sup>8</sup>. Thus, genetic study may reveal a genetic basis for significant percentage of patients with so-called “idiopathic” chronic pancreatitis. It becomes acceptable that development of chronic pancreatitis requires a combination of genetic predisposition and environmental, structural, or toxic insult<sup>9</sup>.

1  
2  
3 Therefore, identification of genetic and environmental risk factors could offer the potential  
4 tool for risk assessment, early diagnosis, and earlier intervention of chronic pancreatitis <sup>10</sup>.  
5  
6

7  
8 Many studies have discovered that mutations plus the copy number variations (CNVs) in  
9  
10 *PRSSI* (trypsinogen), *SPINK1* (serine protease inhibitor Kazal-type 1), *CFTR* (cystic fibrosis  
11 transmembrane conductance regulator), and *CTRC* (chymotrypsin C, also known as caldecrin)  
12 were causally linked to the pathogenesis of ICP <sup>11-13</sup>, while patients with *PRSSI* or *SPINK1*  
13 mutations may be at a higher risk of developing pancreatic cancer <sup>14</sup>. *CFTR* variants were  
14 associated with idiopathic and alcoholic chronic pancreatitis. Furthermore, *CLDN2* was  
15 shown to be strongly associated with chronic pancreatitis, suggesting that it probably acts as a  
16 disease modifier to accelerate the development and progression of chronic pancreatitis  
17 through a non-trypsin-dependent process since *CLDN2* is a highly regulated tight junction  
18 protein to form ion and water channels between endothelial cells <sup>8</sup>. However, as the largest  
19 populated country in the world, the incidence of chronic pancreatitis, including pediatric  
20 chronic pancreatitis, has risen rapidly <sup>2, 15</sup>, whereas there have been only a few studies  
21 reporting that genetic factors contributed the pathogenesis of chronic pancreatitis in China,  
22 but none of these studies focused on ICP in children <sup>13, 16</sup>. In addition, China is different from  
23 the Western countries in regards to ethnic and cultural backgrounds, socioeconomic status,  
24 climatic conditions, and dietary habits. In this pilot study, we identified mutations in *PRSSI*,  
25 *SPINK1*, *CFTR*, *CTRC* and *CLDN2* genes and CNVs of *PRSSI* to determine the spectrum  
26 and frequency of the mutations and CNVs in unrelated children with ICP in the mainland of  
27 China. The data from this study will provide information into the genetic basis of pediatric  
28 ICP in China.  
29  
30  
31  
32  
33  
34  
35  
36  
37  
38  
39  
40  
41  
42  
43  
44  
45  
46  
47  
48  
49  
50

## 51 **Patients and Methods**

### 52 ***Study population and diagnosis criteria***

53  
54  
55 We recruited 75 ICP patients under 18 years old from Changhai Hospital between  
56 January 1997 and December 2008. There was no history of tobacco smoking or alcohol  
57  
58  
59  
60

1  
2  
3  
4  
5  
6  
7  
8  
9  
10  
11  
12  
13  
14  
15  
16  
17  
18  
19  
20  
21  
22  
23  
24  
25  
26  
27  
28  
29  
30  
31  
32  
33  
34  
35  
36  
37  
38  
39  
40  
41  
42  
43  
44  
45  
46  
47  
48  
49  
50  
51  
52  
53  
54  
55  
56  
57  
58  
59  
60

consumption in these patients. All patients originated from the Han ethnicity in the mainland of China. The diagnose criteria of CP and ICP was defined as a condition characterized by typical history (abdominal pain, diabetes mellitus and/or steatorrhea) and the presence of any one of the following findings: i) ductal changes on ERCP; ii) pancreatic calcification on imaging examination; or iii) histological evidence of CP <sup>17-18</sup>. Furthermore, affected individuals were classified as having ICP if precipitating risk factors (such as alcohol abuse, trauma, previous medication, infection, metabolic disorders and/or a positive family history) were absent <sup>19</sup>. This study was approved by the Ethics Committee of Changhai Hospital, Shanghai and a written informed consent was given by their parents or legal guardians according to the ethical guidelines of the Declaration of Helsinki.

### ***DNA isolation***

Peripheral blood samples were collected from each patient in a ethylene diamine tetra acetic acid (EDTA)-anticoagulated tube and frozen at -20°C for subsequent DNA extraction. Genomic DNA was isolated from 500 µl samples using the Lab-aid 800 automatic nucleic acid extraction machine following a standard protocol and quantified using a NanoDrop machine (Thermo, Wilmington, USA).

### ***PCR analyses of gene mutations***

DNA samples from patients were subjected to polymerase chain reaction (PCR) analyses of gene mutations. Specifically, primers flanking the targeted regions of *PRSSI*, *SPINK1*, *CFTR*, *CTRC* and *CLDN2* genes were designed and synthesized according to the nucleotide sequence published by NCBI as shown in Supplemental Table 1. The data on mutation analyses were confirmed by DNA sequence and repeated using PCR. PCR was performed in the GeneAmp 9700 System (Applied Biosystems, Foster city, CA) using a 15-µL reaction mixture containing 7.5 µl 2×Taq Mix (Vivantis, USA), 5.7 µl ddH<sub>2</sub>O, 1.5 µl DNA templates (10 ng/µl), and 0.15 µl of each primer (20 mM). PCR amplification was set at an initial 6 min

1  
2  
3 denaturation at 94°C, followed by 35 cycles of 30 s at 94°C, 30 s at 58°C (*PRSS1*, *SPINK1*)  
4 or 56°C (*CFTR*, *CTRC*, *CLDN2*), 45 s at 72°C, and a final extension at 72°C for 7 min. PCR  
5 products were then incubated with 0.1 U shrimp alkaline phosphatase at 37°C for 1 h,  
6 followed by heat inactivation at 85°C for 20 min and then sequenced using an ABI Prism  
7 BigDye Terminator Cycle Sequencing Kit, version 3.1 on an ABI Prism 3730 sequencer  
8 (Applied Biosystems). Data passed a duplicate quality-control test using four samples and  
9 showed 100% concordance.  
10  
11  
12  
13  
14  
15  
16

17  
18 Vector NT1, Chromas and Bioedit software were applied to analyze the results.  
19  
20  
21  
22

### 23 ***Detection of gene copy number variations (CNVs)***

24  
25 A pre-designed and validated CNV assay kit to assess *PRSS1* CNVs was obtained from  
26 AB Life Technologies (Hs03184214\_cn) (see details in Supplemental Table 2). RT-PCR was  
27 performed using 2×Taqman Genotyping Master Mix 5 µl (Vivantis), ddH<sub>2</sub>O 0.5 µl, DNA  
28 templates (10 ng/µl) 4 µl, 0.25 µl Taqman Copy Number Assay (Vivantis) and 0.25 Taqman  
29 Copy Number Assay (Vivantis) in a total volume of 10 µl. Cycle conditions were as follows:  
30 initial denaturation for 10 minutes at 95°C, followed by 40 cycles of (15 s at 95°C, and 60s at  
31 60°C) in an 7900 RT-PCR thermal cycler (Applied Biosystems). The assays were performed  
32 in triplicate and repeated at least once for each sample. *PRSS1* gene copy number was  
33 calculated compared to the proportion to RNaseP reference assay (AB Life Technologies  
34 cat#4403326). Data were analyzed using Copy Caller Software (version 1.0 from AB Life  
35 Technologies).  
36  
37  
38  
39  
40  
41  
42  
43  
44  
45  
46  
47  
48  
49  
50  
51

### 52 ***Statistical analyses***

53 Continuous data were reported as mean ± standard deviation (SD) analyzed using a  
54 Student's t-test and/or u-test. Fisher's exact test or chi-square test was used to analyze the  
55 categorical data. The gene mutations or CNVs were associated with age at diagnosis,  
56  
57  
58  
59  
60



1  
2  
3 pancreatic calcification, changes in pancreatic duct (stenosis or dilatation), pancreatic  
4 calcification, and pancreatic pseudocyst for clinical significance of these mutations<sup>19</sup>.  
5  
6

7 The age onset was divided into two subgroups according to the mean value. A *P* value  
8 of less than 0.05 was considered statistically significant and all reported *P* values were  
9 two-sided.  
10  
11  
12

## 13 14 15 16 17 **Results**

### 18 19 *Baseline clinical characteristics of study participants*

20  
21 A total of 75 unrelated children were included in this study, i.e., 40 boys and 35 girls and  
22 age at first onset was  $11.91 \pm 3.79$  years (ranged between 3 and 18 years). Clinically, 81.3%  
23 (61/75) of the patients showed acute pancreatitis, 13 patients began with pure abdominal pain,  
24 3 patients with weight loss, 1 patient with diarrhea, and 1 patient with high blood glucose.  
25  
26  
27  
28  
29

30 Imaging examinations, including CT, MRCP or ERCP, detected pancreatic duct stones  
31 in 45 patients, changes in pancreatic duct (stenosis or dilatation) in 57 patients, pancreatic  
32 calcification in 15 patients, pancreatic pseudocyst in 15 patients, and pancreatic divisum in 4  
33 patients (Table 1). Laboratory tests showed that six patients had increased levels of CA199, a  
34 biomarker for pancreatic cancer, six patients had high blood cholesterol, two had increased  
35 blood glucose, and two patients had low blood calcium levels.  
36  
37  
38  
39  
40  
41  
42  
43  
44

### 45 46 *Analyses of PRSSI, SPINK1, CFTR and CTRC gene mutations in these patients*

47  
48 We then analyzed mutations of *PRSSI*, *SPINK1*, *CFTR* and *CTRC* gene in these 75  
49 patients and found three types of heterozygous *PRSSI* mutations in seven patients, including  
50 N29I (n=1) in exon 2, and R122H (n=6) with c.365G>A (n=5) and c.364C> T (n=1) in exon  
51 3(Supplemental Figure 1). A single gene mutation of *SPINK1* occurred in 43 patients,  
52 including 10 homozygous and 33 heterozygous *SPINK1* mutation (IVS3+2T>C). However,  
53  
54  
55  
56  
57  
58 there was no single patient with *PRSSI* mutation who had a *SPINK1* mutation, making 9.3%  
59  
60

(7/75) and 57.3% (43/75) of, *PRSSI* and *SPINK1* mutation rates, respectively and an overall rate of 66.6% (50/75) of patients who at least had one *PRSSI* or *SPINK1* mutation (Table 2).

Furthermore, one patient had *CFTR* gene deletions of GCTTCCTA sequences between c.500 to c.508 at exon4, leading to an early stop codon (Figure 1). *CFTR* gene C.2562 T>G polymorphism was also detected in 51 patients, 14 of whom were homozygous. Heterozygous *CFTR* gene c.4389G>A mutation was identified in another patient. Moreover, there were four types of TG-repeats and poly-T tract including (TG)<sub>10</sub>-T<sub>7</sub>(n=2), (TG)<sub>11</sub>-T<sub>7</sub>(n=55), (TG)<sub>12</sub>-T<sub>5</sub>(n=5) and (TG)<sub>12</sub>-T<sub>7</sub>(n=13) in the junction of intron 8 and exon 9 and (TG)<sub>11</sub>-T<sub>7</sub> of *CFTR* gene found in 73.3% of these patients (Supplemental Table 3). In addition, *CFTR* gene V allele was slightly more frequent than the M allele at codon 470 (59.3% and 40.7%, respectively). The dominant genotype was M/V followed by V/V and M/M (Supplemental Table 4).

However, we screened six types of CTTC mutations, including c.143A>G, c.217G>A, c.180C>T in exon 3, c.703G>A, c.760C>T, and p.K247\_R254del in exon 7 in these 75 patients, but did not find any mutations. In addition, we screened both exons of *CLDN2* and found four types of heterozygous mutations in a total of 26 patients (Table 2), i.e., c.22G>A at exon 1, c.327A>T, c.592A>C and c.768T>C at exon 2. C.592A>C is a missense mutation, while the other three types are nonsense. However, none of these patients had more than one type of *CLDN2* mutation.

#### *Analyses of PRSSI gene copy number variations in these patients*

*PRSSI* gene copy numbers were normal in most patients. Specifically, *PRSSI* gene copy number in 70 patients had two copies detected using the probe Hs03184214\_cn, whereas four patients had only one copy and another patient had five copies (Figure 2).

#### *Association of mutations with clinicopathological data*

We associated these genetic alterations with clinicopathological data from the 75 patients. Our data showed that three mutations of IVS3+2T>C in *SPINK1* gene, M470V and c.2562 T>G in *CFTR* gene had relatively higher frequencies than other genetic alterations and were associated with clinicopathological data. Briefly, the rates of pancreatic duct stones, pancreatic pseudocyst and pancreatic calcification were higher in patients with a *SPINK1* gene IVS3+2T>C mutation than that of patients without IVS3+2T>C (69.8% vs., 46.9%  $P=0.045$ ; 11.6% vs. 31.25%  $P=0.036$ ; 27.9% vs. 9.4%  $P=0.047$ , respectively). The rate of pancreatic pseudocyst was lower in patients with the *SPINK1* gene IVS3+2T>C mutation than that of patients without IVS3+2T>C (11.6% vs. 31.25%  $P=0.036$ ) (Table 3). However, there was no statistical significance between age at diagnosis of patients with and without IVS3+2T>C mutation. M470V and c.2562 T>G were not significantly associated with these clinical characteristics.

## Discussion

In the present study, we revealed *PRSSI*, *SPINK1*, *CFTR*, *CTRC* and *CLDN2* gene mutations in ICP patients, especially *PRSSI* and *SPINK1* gene mutations, occurred in almost 70% of Chinese ICP children. To the best of our knowledge, this is the first study to determine the spectrum and frequency of *PRSSI*, *SPINK1*, *CFTR*, *CTRC* and *CLDN2* gene mutations and *PRSSI* CNVs in unrelated CP children in China. The data indicate that genetic changes occurring in Chinese ICP patients could associate with ICP development. Further study will investigate how these gene alterations contribute to ICP development.

Our current data on the frequency of *PRSSI* mutations were similar to those (9.3% vs. 9-23%) of a previous study on children with CP or ICP<sup>20</sup>, however, our data on the frequency of *SPINK1* mutations (57.3%) appeared higher than those (19-40%) reported in the previous study<sup>3</sup>. Moreover, Witt et al.<sup>20</sup> first showed *PRSSI* gene mutations (3/30 cases at 3×A16V) in German pediatric CP patients. Thereafter, they showed that in a study of 96 unrelated CP children, *PRSSI* gene mutations (5×A16V, 1×N29I, and 5×R122H) occurred in 11 (11.5%)

1  
2  
3 patients<sup>3</sup>. In a review of 164 unrelated children with CP, the frequency was reported to be  
4  
5 9.1% (n=15, 8×A16V, 5×R122H, and 2×N29I)<sup>21</sup>. *PRSSI* gene mutations were detected in  
6  
7 two (12.5%, 1×R122H and 1×A16V) of 16 patients classified as having early-onset ICP in a  
8  
9 Swiss study<sup>22</sup> and in 11 (23.1%) of 52 children with CP (6×R122H, 4×R122C, 1×N29I) in a  
10  
11 Polish study<sup>23</sup>. In our current study, *PRSSI* mutations were found in 9.3% of 75 Chinese  
12  
13 pediatric ICP patients, which included N29I and R122H mutations. Heterozygous mutations  
14  
15 of the *PRSSI* gene commonly occurred in CP patients in the Western populations<sup>20,23</sup> and  
16  
17 was the only form of mutation in our patients, indicating that the main spectrum and  
18  
19 frequency of *PRSSI* gene mutations in Chinese ICP children are similar to those reported in  
20  
21 pediatric patients in Western countries<sup>20-23</sup>. The *PRSSI* mutations seem to be one of the  
22  
23 predisposing factors for ICP, irrespective of race, although the third most common *PRSSI*  
24  
25 mutation (i.e., A16V) is not found in our study. However, these spectrum and frequency are  
26  
27 different from most previous Asian studies, in which *PRSSI* mutations were at a low  
28  
29 frequency or even absent<sup>13, 24-25</sup>. In a previous study on 129 Chinese ICP patients (34  
30  
31 early-onset and 95 late-onset using a cut-off age of 35 years), Chang et al.<sup>13</sup> showed *PRSSI*  
32  
33 mutations in six (4.6%) patients; in two (5.9%) patient with early-onset (1×R116C and  
34  
35 1×C139S) and four (4.2%) patients with late-onset (1×L104P, 1×R116C, 1×T137M and  
36  
37 1×C139S). These mutations are all considered relatively uncommon mutations in Western  
38  
39 countries<sup>26</sup>. The potential reason for this discrepancy may be due to the sampling bias, i.e.,  
40  
41 Chang's study included both children and adults, whereas our current study only included  
42  
43 children.

44  
45 One of the most significant findings in our current study was the high frequency of  
46  
47 *SPINK1* IVS3+2T>C mutation, which was first reported by Kume K et al. They showed a  
48  
49 *SPINK1* IVS3+2T>C mutation in 13-16% of unrelated Japanese ICP patients<sup>27</sup>. However,  
50  
51 two additional studies from Western countries reported IVS 3+2T>C mutation only in one  
52  
53 (1.0%) of 96 and in 3 (2.7%) of 112 pediatric ICP patients<sup>3,12</sup>. the IVS 3+2T>C mutation has  
54  
55 been found in three (1.7%) of 172 German CP patients, but was thought to be a rare  
56  
57 polymorphism and not a mutation<sup>28</sup>. However, a recent Chinese study on 129 ICP patients  
58  
59  
60

1  
2  
3 revealed a IVS 3+2T>C mutation in 8.5% of patients and the mutation was predominantly  
4 responsible for early-onset ICP (29.4% in early-onset vs. 1.1% in late-onset)<sup>13</sup>. Alternatively,  
5 Pfutzer et al. [12] showed a frequency of N34S mutation in *SPINK1* in 40.4% (23/57) of  
6 American ICP children, whereas Truninger et al.<sup>11</sup> reported a frequency of the mutation at  
7 43% (6/14) German patients with early-onset ICP. In patients with tropical calcific  
8 pancreatitis, which is an idiopathic, juvenile, non-alcoholic form of CP widely prevalent in  
9 several tropical countries such as India, N34S mutation can reach 46%. In the present study,  
10 IVS 3+2T>C mutations were found in 57.3% (43/75) of unrelated Chinese ICP children, but  
11 we did not find any N34S mutations in the current study. These data suggest that the  
12 spectrum and frequency of *SPINK1* mutations vary geographically among different  
13 populations; IVS 3+2T>C mutations are more common in Chinese ICP children, whereas  
14 N34S mutations are more frequent in Western populations. The underlying role and  
15 molecular mechanisms of the IVS3+2T>C mutation in CP development are being explored.  
16 For example, this mutation was in complete linkage disequilibrium with -215G>A mutation,  
17 which might alter the efficiency of the *SPINK1* gene transcription. IVS3+2T>C mutation  
18 affects the splicing donor site that is highly conserved in eukaryotes<sup>3</sup>. IVS3+2T>C mutations  
19 can cause skipping of the whole of exon 3, where the trypsin binding site is located, leading  
20 to the loss of the trypsin binding site [27], altered expression of *SPINK1* protein in CP  
21 patients with the IVS3+2T>C mutation, affecting the protease/antiprotease balance within the  
22 pancreas. However, further studies are necessary to elucidate the underlying molecular  
23 mechanisms.

24  
25  
26  
27  
28  
29  
30  
31  
32  
33  
34  
35  
36  
37  
38  
39  
40  
41  
42  
43  
44  
45 In addition, the second significant finding of our current study is *CFTR* gene  
46 polymorphisms, such as M470V (n=51), c.2562T>G (n=51), TG repeats, and poly T tract in  
47 Chinese ICP children. We found that 68% (51/75) patients had both c.2562 T>G and M470V  
48 polymorphisms, including heterozygous and homozygous alleles and one patient with  
49 heterozygous c.4389G>A mutation. Both c.2562T>G and c.4389G>A mutations are nonsense,  
50 while an obstructive tubulopathy of the pancreas due to the *CFTR* dysfunction is thought to  
51 play a primary role in CP development, although the exact pathogenic process of pancreatitis  
52  
53  
54  
55  
56  
57  
58  
59  
60

1  
2  
3 associated with *CFTR* mutations is still under investigation. The function of *CFTR* in the  
4 pancreas is to dilute and alkalize the protein-rich acinar secretions, so that the formation of  
5 protein plugs that lead to pancreatic injury may be prevented. A M470V polymorphism on  
6 exon 10 affects the intrinsic chloride activity, and thereby affects *CFTR* protein function. The  
7 TG repeats and poly-T tract can influence *CFTR* at transcription levels because these intronic  
8 variants could lead to reductions in protein synthesis and expression, or altered splicing to  
9 compromise the intracellular transport and/or activity. Huang et al conducted the first  
10 comprehensive study on the functional polymorphisms of *CFTR* in Chinese healthy subjects  
11 and found that T7 was the most common haplotype (93.6%) and (TG)11 and (TG)12 were the  
12 dominant haplotypes in the junction of intron 8 and exon 9<sup>29</sup>. Our current data also validated  
13 (TG)11-T7 as the most common type. The poly-T, TG-repeats and M470V distributions were  
14 similar to those studies on other East Asians<sup>30-31</sup>. In addition, a diverse range of *CFTR*  
15 loss-of-function variants have been reported to be associated with ICP and alcoholic CP,  
16 whereas their functional effects remain to be defined. Recently, Whitcomb et al reported that  
17 the coinheritance of *CFTR* R75Q and *SPINK1* variants is significantly higher in patients with  
18 ICP than in controls (8.75% vs. 0.38%). Using patch-clamp techniques, they also found that  
19 the *CFTR* genotype caused a selective defect in bicarbonate conductance<sup>32</sup>. Another study  
20 from Australia showed that symptomatic pancreatitis occurs in 20% of pancreatic sufficient  
21 cystic fibrosis patients. To evaluate genotype–phenotype interactions, they developed the  
22 Pancreatic Insufficiency Prevalence (PIP) score to determine severity in a large number of  
23 *CFTR* mutations and found that specific *CFTR* genotypes were associated with pancreatitis,  
24 i.e., patients carrying genotypes with mild phenotypic effects may have a greater risk of  
25 developing pancreatitis than patients carrying genotypes with moderate-severe phenotypic  
26 consequences at any given time<sup>33</sup>. In addition, common *CFTR* haplotypes seem to modulate  
27 susceptibility to CP.  
28  
29  
30  
31  
32  
33  
34  
35  
36  
37  
38  
39  
40  
41  
42  
43  
44  
45  
46  
47  
48  
49  
50  
51

52  
53 Although multiple rare *CTRC* gene mutations have been associated with CP in European  
54 and Asian populations, our current study did not find any *CTRC* mutations in Chinese ICP  
55 children, indicating that *CTRC* mutation varies geographically or ethnically. According to the  
56  
57  
58  
59  
60



1  
2  
3 biochemical activities and the functional properties of *CTRC* variants, Zhou and Sahin-Tóth  
4 hypothesized three mutually nonexclusive models to demonstrate the possible role of *CTRC*  
5 variants in predisposing to CP: i). Impaired trypsinogen and/or trypsin degradation; ii).  
6 Impaired activation of A-type carboxylpeptidases; and iii). Induction of endoplasmic  
7 reticulum stress<sup>34</sup>. We infer that *CTRC* might play a limited role, if any, in the pathogenesis  
8 of CP in China.  
9

10  
11  
12  
13  
14  
15 However, until 2012, genetic variation in *CLDN2* has not previously been associated  
16 with disease in humans. A two-stage (discovery and replication) genome-wide association  
17 study (GWAS) showed that *CLDN2* genotype confers the greatest risk for CP, and its alleles  
18 via interacting with alcohol consumption, can amplify the risk. These data could partially  
19 explain the higher frequency of alcohol-related pancreatitis in men than women while the real  
20 causal relationship between CP and *CLDN2* has been ambiguously defined. Our current data  
21 are the first study on *CLDN2* SNPs in Chinese ICP patients to report four novel SNPs. Only  
22 one of these is a missense mutation known as c.592A>C in CDS of *CLDN2* gene, making the  
23 amino acid change from Met to Leu. This patient was a girl who was diagnosed as ICP after  
24 several episodes of acute pancreatitis since she was 13 years old. All of these clinical  
25 characteristics showed no deviances from other patients. Claudin-2 encoded by *CLDN2* is  
26 normally expressed at low levels in the tight junction between cells of the pancreatic ducts  
27 and in pancreatic islets. But when stressed, acinar cells can also express claudin-2, proved by  
28 porcine models of acute pancreatitis<sup>35</sup>. Besides, the *CLDN2* promoter includes a nuclear  
29 factor (NF)-κB-binding site<sup>36</sup>, and *CLDN2* expression is enhanced in other cells under  
30 conditions associated with injury and stress.  
31  
32  
33  
34  
35  
36  
37  
38  
39  
40  
41  
42  
43  
44  
45  
46

47 In an attempt to associate these mutations with clinical parameters from these ICP  
48 patients, we did not observe any association between the gene mutations and an earlier age of  
49 CP diagnosis, which is contrary to a previous study<sup>37</sup>. However, showed that patients with  
50 IVS3+2T>C mutation were more likely to have pancreatic duct stones or pancreatic  
51 calcification than those without such a mutation. It has been well known that patients with  
52 pancreatic calcification are more severe than those without pancreatic calcification.  
53  
54  
55  
56  
57  
58  
59  
60

1  
2  
3 Therefore, our observations, along with previous findings <sup>27</sup> suggest that a IVS3+2T>C  
4 mutation in *SPINK1* predisposes to more severity of CP. Moreover, CP patients have a  
5 markedly increased risk in developing pancreatic cancer compared to the general population  
6  
7  
8  
9 <sup>14, 15</sup> and *PRSS1* or *SPINK1* mutation may be a predictor for pancreatic cancer development in  
10 CP patients. The IVS3+2T>C mutation was present in 0.6% of the sporadic pancreatic cancer  
11 patients. Thus, CP patients with *PRSS1* or *SPINK1* mutation should avoid any risk factors,  
12 including alcohol and tobacco, be monitored for any signs or symptoms (pain, weight loss,  
13 jaundice, and/or abdominal mass) or with serum markers and imaging examination for  
14 pancreatic cancer.  
15  
16  
17  
18  
19  
20  
21

22 CNVs often occur in human cancers and the compositions of CNVs may contain  
23 deletion, amplification, deletion plus amplification, multiple alleles and complicated locus.  
24 Lafrate and Sebat were the first to respectively report CNVs in human genome in 2004 <sup>38</sup>. To  
25 date, many studies proved that both CNVs and SNP can affect gene expressions. However,  
26 the effect of *PRSS1* gene CNVs on ICP has not been fully studied. In our study, the 4 patients  
27 with 1 copy were found not to be complicated with any mutations screened above. So,  
28 reduced CNV can also be detected in patients with ICP, contradicting the hypothesis that  
29 reduced CNV may be a protect factor, which needs further studies.  
30  
31  
32  
33  
34  
35  
36  
37  
38  
39

#### 40 **Acknowledgements**

41  
42 We thank *Medjaden* Bioscience Limited, Hong Kong, China, for assistance in  
43 preparation of this manuscript.  
44  
45  
46  
47

#### 48 **Contributorship statement**

49  
50 Prof. Zhuan Liao and Zhao-Shen Li conceived the project. Dr. Xiao-Tian Sun, Wei  
51 Wang, Xiao-Ling Weng, and Dai-Zhan Zhou completed the DNA isolation, PCR analyses of  
52 gene mutations, and detection of gene copy number variations (CNVs). Dr. Chang Sun, Tian  
53 Xia, Liang-Hao Hu, Xiao-Wei Lai, Bo Ye, Mu-Yun Liu, Fei Jiang, and Jun Gao collected the  
54  
55  
56  
57  
58  
59  
60



1  
2  
3 peripheral blood samples and clinical data. Lu-Min Bo and Yun Liu completed the statistical  
4 analyses.  
5  
6  
7  
8  
9  
10  
11  
12  
13  
14  
15  
16  
17  
18  
19  
20  
21  
22  
23  
24  
25  
26  
27  
28  
29  
30  
31  
32  
33  
34  
35  
36  
37  
38  
39  
40  
41  
42  
43  
44  
45  
46  
47  
48  
49  
50  
51  
52  
53  
54  
55  
56  
57  
58  
59  
60

For peer review only

## References

1. Keller J, Luyer P. Idiopathic chronic pancreatitis. *Best Pract Res Clin Gastroenterol* 2008;22:105-113.
2. Wang W, Liao Z, Li ZS, et al. Chronic pancreatitis in Chinese children: Etiology, clinical presentation and imaging diagnosis. *J Gastroenterol Hepatol* 2009;24:1862-1868.
3. Witt H, Luck W, Hennies HC, et al. Mutations in the gene encoding the serine protease inhibitor, Kazal type 1 are associated with chronic pancreatitis. *Nat Genet* 2000;25:213-216.
4. Chen JM, Férec C. Genetics and pathogenesis of chronic pancreatitis: the 2012 update. *Clin Res Hepatol Gastroenterol* 2012;36:334-40.
5. Whitcomb DC, Gorry MC, Peston RA, et al. Hereditary pancreatitis is caused by a mutations in the cationic trypsinogen. *Nat Genet* 1996;14:141-145.
6. Sharer N, Schwarz M, Malone G, et al. Mutations of the cystic fibrosis gene in patients with chronic pancreatitis. *N Engl J Med* 1998;339:645-652.
7. Rosendahl J, Witt H, Szmola R, et al. Chymotrypsin C (CTRC) mutations that diminish activity or secretion are associated with chronic pancreatitis. *Nat Genet* 2008;40:78-82.
8. Whitcomb DC, LaRusch J, Krasinskas AM, et al. Common genetic variants in the CLDN2 and PRSS1-PRSS2 loci alter risk for alcohol-related and sporadic pancreatitis. *Nat Genet* 2012;44:1349-54.
9. Witt H, Apte MV, Keim V, et al. Chronic pancreatitis: challenges and advances in pathogenesis, genetics, diagnosis, and therapy. *Gastroenterology* 2007;132:1557-1573.
10. Treiber M, Schlag C, Schmid RM. Genetics of pancreatitis: a guide for clinicians. *Curr Gastroenterol Rep* 2008;10:122-127.
11. Truninger K, Witt H, Kock J, et al. Mutations of the serine protease inhibitor, Kazal type 1 gene, in patients with idiopathic chronic pancreatitis. *Am J Gastroenterol* 2002;97:1133-1137.
12. Pfutzer RH, Barmada MM, Brunskil AP, et al. *SPINK1*/PSTI polymorphisms act as disease modifiers in familial and idiopathic chronic pancreatitis. *Gastroenterology* 2000;119:615-623.
13. Chang YT, Wei SC, L PC, et al. Association and differential role of *PRSS1* and *SPINK1* mutations in early-onset and late-onset idiopathic chronic pancreatitis in Chinese subjects. *Gut* 2009;58:885.
14. Rebours V, Boutron-Ruault MC, Schnee M, et al. The natural history of hereditary pancreatitis: a national series. *Gut* 2009;58:97-103.

15. Wang LW, Li ZS, Li SD, et al. Prevalence and clinical features of chronic pancreatitis in China: A retrospective multicenter analysis over 10 years. *Pancreas* 2009;38:248-254.
16. Chang MC, Chang YT, Wei SC, et al. Association of Novel Chymotrypsin C Gene Variations and Haplotypes in Patients with Chronic Pancreatitis in Chinese in Taiwan. *Pancreatology* 2009;9:287-292.
17. Tandon RK, Sato N, Garg PK, Consensus Study Group. Chronic pancreatitis: Asia-Pacific consensus report. *J Gastroenterol Hepatol* 2002;17:508-518.
18. Axon AT, Classen M, Cotton PB. Pancreatography in chronic pancreatitis: International definitions. *Gut* 1984;25:1107-1112.
19. Witt H, Sahin-Tóth M, Landt O, et al. A degradation-sensitive anionic trypsinogen (PRSS2) variant protects against chronic pancreatitis. *Nat Genet* 2006;38:668-673.
20. Witt H, Luck W, Becker M. A signal peptide cleavage site mutations in the cationic trypsinogen is strongly associated with chronic pancreatitis. *Gastroenterology* 1999;117:7-10.
21. Witt H. Gene mutations in children with chronic pancreatitis. *Pancreatology* 2001;1:432-438.
22. Truninger K, Kock J, Wirth HP, et al. Trypsinogen gene mutations in patients with chronic or recurrent acute pancreatitis. *Pancreas* 2001;22:18-23.
23. Sobczynska-Tomaszewska A, Bak D, Oralewska B, et al. Analysis of CFTR, *SPINK1*, *PRSSI* and AAT mutations in children with acute or chronic pancreatitis. *J Pediatr Gastroenterol Nutr* 2006;43:299-306.
24. Nishimori I, Kamakura M, Fujikawa-Adachi K, et al. Mutations in exons 2 and 3 of the cationic trypsinogen gene in Japanese families with hereditary pancreatitis. *Gut* 1999;44:259-263.
25. Oh HC, Kim MH, Choi KS, et al. Analysis of *PRSSI* and *SPINK1* mutations in Korean patients with idiopathic and familial pancreatitis. *Pancreas* 2009;38:180-183.
26. Teich N, Rosendahl J, Toth M, et al. Mutations of human cationic trypsinogen (*PRSSI*) and chronic pancreatitis. *Hum Mutat* 2006, 27: 721-730.
27. Kume K, Masamune A, Kikuta K, et al. [-215G>A; IVS3+2T>C] mutation in the *SPINK1* gene causes exon 3 skipping and loss of the trypsin binding site. *Gut* 2006;55:1214.
28. Kalinin VN, Kaifi JT, Schwarzenbach H, et al. Association of rare *SPINK1* gene mutation with another base substitution in chronic pancreatitis patients. *World J Gastroenterol* 2006;12:5352-5356.

- 1
- 2
- 3 29. Huang Q, Ding W, Wei MX. Comparative analysis of common CFTR polymorphisms
- 4 poly-T, TG-repeats and M470V in a healthy Chinese population. *World J Gastroenterol*
- 5 2008;14:1925-30.
- 6
- 7
- 8 30. Nam MH, Hijikata M, Tuan le A, et al. Variations of the CFTR gene in the
- 9 Hanoi-Vietnamese. *Am J Med Genet A* 2005;136:249-53.
- 10
- 11 31. Fujiki K, Ishiguro H, Ko SB, et al. Genetic evidence for CFTR dysfunction in Japanese:
- 12 background for chronic pancreatitis. *J Med Genet* 2004; 41:e55.
- 13
- 14 32. Schneider A, Larusch J, Sun X, et al. Combined bicarbonate conductance-impairing
- 15 variants in CFTR and SPINK1 variants are associated with chronic pancreatitis in
- 16 patients without cystic fibrosis. *Gastroenterology* 2011;140:162-71.
- 17
- 18 33. Chee Y. Ooi, Peter R. Cystic fibrosis transmembrane conductance regulator (CFTR) gene
- 19 mutations in pancreatitis. *Journal of Cystic Fibrosis* 2012;11:355-62.
- 20
- 21
- 22 34. Zhou J, Sahin-Tóth M. Chymotrypsin C mutations in chronic pancreatitis. *J*
- 23 *Gastroenterol Hepatol* 2011;26:1238-46.
- 24
- 25 35. Lee JH, Kim KS, Kim TJ, et al. Immunohistochemical analysis of claudin expression in
- 26 pancreatic cystic tumors. *Oncol. Rep* 2011;25:971-78.
- 27
- 28 36. Sakaguchi T, Gu X, Golden HM, et al. Cloning of the human claudin-2 5'-flanking
- 29 region revealed a TATA-less promoter with conserved binding sites in mouse and human
- 30 for caudal-related homeodomain proteins and hepatocyte nuclear factor-1alpha. *J Biol*
- 31 *Chem.* 2002;277:21361-70.
- 32
- 33 37. Howes N, Lerch MM, Greenhalf W, et al. Clinical and genetic characteristics of
- 34 hereditary pancreatitis in Europe. *Clin Gastroenterol Hepatol* 2004;2:252-261.
- 35
- 36 38. Sebat J, Lakshmi B, Troge J, et al. Large-scale copy number polymorphism in the human
- 37 genome. *Science* 2004;305:525-528.
- 38
- 39
- 40
- 41
- 42
- 43
- 44
- 45
- 46
- 47
- 48
- 49
- 50
- 51
- 52
- 53
- 54
- 55
- 56
- 57
- 58
- 59
- 60

Table 1 Characteristics of the ICP study participants

|                                        |              |
|----------------------------------------|--------------|
| Age, median (range), years             | 11.91 (3-18) |
| Sex, n (%)                             |              |
| Female                                 | 35           |
| Male                                   | 40           |
| Clinical symptoms, n (%)               |              |
| Acute pancreatitis                     | 61           |
| Pure abdominal pain                    | 13           |
| Weight loss                            | 3            |
| Diarrhea                               | 1            |
| High blood glucose                     | 1            |
| Other                                  | 0            |
| Imaging examination (CT, MRCP or ERCP) |              |
| Pancreatic duct stenosis or dilation   | 57           |
| Pancreatic duct stones                 | 45           |
| Pancreatic pseudocyst                  | 15           |
| Pancreatic calcification               | 15           |
| Other                                  | 4*           |
| Laboratory tests                       |              |
| Increased CA199                        | 6            |
| Increased blood cholesterol            | 6            |
| Increased blood glucose                | 2            |
| Decreased blood calcium                | 2            |

\* Pancreatic Divisum

Table 2 *PRSSI*, *SPINK1*, *CFTR* and *CTRC* gene mutations in the ICP patients

| Gene mutations       | Region  | Functional class | Positive, n (%) |
|----------------------|---------|------------------|-----------------|
| <b><i>PRSSI</i></b>  |         |                  |                 |
| A16V                 | Exon 2  | Missense         | 0               |
| N29I                 | Exon 2  | Missense         | 1 (1.3)         |
| E79K                 | Exon 3  | Missense         | 0               |
| R116C                | Exon 3  | Missense         | 0               |
| A121T                | Exon 3  | Missense         | 0               |
| R122H or R122C       | Exon 3  | Missense         | 6 (8.0)*        |
| <b><i>SPINK1</i></b> |         |                  |                 |
| N34S                 | Exon 3  | Missense         | 0               |
| IVS3+2T>C            | IVS 3   | Splicing         | 43 (57.3)**     |
| <b><i>CFTR</i></b>   |         |                  |                 |
| R117H                | Exon 4  | Missense         | 0***            |
| F508del              | Exon 11 | Del              | 0               |
| c.2562T>G            | Exon 15 | Nonsense         | 51 (68.0)****   |
| c.4389G>A            | Exon 27 | Nonsense         | 1 (1.3)         |
| <b><i>CTRC</i></b>   |         |                  |                 |
| c.143A>G             | Exon 3  | Missense         | 0               |
| c.180C>T             | Exon 3  | Nonsense         | 0               |
| c.217G>A             | Exon 3  | Missense         | 0               |

|                |        |          |   |
|----------------|--------|----------|---|
| c.703G>A       | Exon 7 | Missense | 0 |
| c.760C>T       | Exon 7 | Missense | 0 |
| p.K247_R254del | Exon 7 | Del      | 0 |

**CLDN2**

|          |        |          |    |
|----------|--------|----------|----|
| c.22G>A  | Exon 1 | Nonsense | 2  |
| c.327A>T | Exon 2 | Nonsense | 1  |
| c.592A>C | Exon 2 | Missense | 1  |
| c.768T>C | Exon 2 | Nonsense | 22 |

---

\* one was c.364 C>T and other five were c.365 G>A

\*\* 33 were heterozygous and 10 were homozygous

\*\*\* one patient has the deletions of GCTTCCTA from c.500 to c.508

\*\*\*\* 37 were heterozygous and 14 were homozygous

1  
2  
3  
4  
5  
6  
7  
8  
9  
10  
11  
12  
13  
14  
15  
16  
17  
18  
19  
20  
21  
22  
23  
24  
25  
26  
27  
28  
29  
30  
31  
32  
33  
34  
35  
36  
37  
38  
39  
40  
41  
42  
43  
44  
45  
46  
47  
48  
49

Table 3 Association of gene mutation (IVS3+2T>C, M470V and c.2562T>G) with clinicopathological data from the 75 patients

| Mutations | Age at diagnosis |     |                |       | Pancreatic duct stenosis<br>or dilation |    |                |       | Pancreatic duct stones |    |                |       | Pancreatic pseudocyst |    |                |       | Pancreatic calcification |    |                |       |       |
|-----------|------------------|-----|----------------|-------|-----------------------------------------|----|----------------|-------|------------------------|----|----------------|-------|-----------------------|----|----------------|-------|--------------------------|----|----------------|-------|-------|
|           | <12              | ≥12 | X <sup>2</sup> | P     | Yes                                     | No | X <sup>2</sup> | P     | Yes                    | No | X <sup>2</sup> | P     | Yes                   | No | X <sup>2</sup> | P     | Yes                      | No | X <sup>2</sup> | P     |       |
|           | value            |     |                |       | value                                   |    |                |       | value                  |    |                |       | value                 |    |                |       |                          |    |                |       |       |
| IVS3+2T>C | Yes              | 17  | 26             | 0.815 | 0.367                                   | 34 | 9              | 0.521 | 0.471                  | 30 | 13             | 4.006 | 0.045                 | 5  | 38             | 4.415 | 0.036                    | 12 | 31             | 3.938 | 0.047 |
|           | No               | 16  | 16             |       |                                         | 23 | 9              |       |                        | 15 | 17             |       |                       | 10 | 22             |       |                          | 3  | 29             |       |       |
| M470V     | MM               | 18  | 23             | 0.199 | 0.905                                   | 32 | 9              | 0.305 | 0.859                  | 25 | 16             | 0.773 | 0.679                 | 9  | 32             | 1.566 | 0.457                    | 11 | 30             | 2.664 | 0.264 |
|           | MV               | 5   | 5              |       |                                         | 7  | 3              |       |                        | 7  | 3              |       |                       | 3  | 7              |       |                          | 1  | 9              |       |       |
|           | VV               | 10  | 14             |       |                                         | 18 | 6              |       |                        | 13 | 11             |       |                       | 3  | 21             |       |                          | 3  | 21             |       |       |
| c.2562T>G | Yes              | 23  | 28             | 0.078 | 0.780                                   | 39 | 12             | 0.019 | 0.899                  | 32 | 19             | 0.500 | 0.479                 | 12 | 39             | 1.241 | 0.265                    | 12 | 39             | 1.241 | 0.265 |
|           | No               | 10  | 14             |       |                                         | 18 | 6              |       |                        | 13 | 11             |       |                       | 3  | 21             |       |                          | 3  | 21             |       |       |



1  
2  
3  
4  
5  
6  
7  
8 **Comprehensive Screening for *PRSS1*, *SPINK1*, *CFTR*, *CTRC* and**  
9  
10 ***CLDN2* Gene Mutations in Chinese Pediatric Patients with**  
11 **Idiopathic Chronic Pancreatitis**  
12  
13

14  
15 Wei Wang<sup>1,\*</sup>, Xiao-Tian Sun<sup>1,\*</sup>, Xiao-Ling Weng<sup>2,\*</sup>, Dai-Zhan Zhou<sup>2,\*</sup>, Chang Sun<sup>1</sup>, Tian  
16 Xia<sup>1</sup>, Liang-Hao Hu<sup>1</sup>, Xiao-Wei Lai<sup>1</sup>, Bo Ye<sup>1</sup>, Mu-Yun Liu<sup>1</sup>, Fei Jiang<sup>1</sup>, Jun Gao<sup>1</sup>,  
17 Lu-Min Bo<sup>1</sup>, Yun Liu<sup>2</sup>, Zhuan Liao<sup>1,#</sup>, Zhao-Shen Li<sup>1,#</sup>  
18  
19

20  
21 <sup>1</sup> Department of Gastroenterology, Changhai Hospital, The Second Military Medicine  
22 University, Shanghai, China  
23

24 <sup>2</sup> Key Laboratory of Developmental Genetics and Neuropsychiatric Diseases (Ministry of  
25 Education), Bio-X Institutes, Shanghai Jiao Tong University, Shanghai, China  
26  
27

28  
29 *\*These four authors contributed equally to this work.*  
30  
31

32 This work was supported by grants from the National Natural Science Foundation of China  
33 (No.81270541, to L.Z.; No. 81170332, to W.W.), Shanghai Rising-Star Program  
34 (No.13QA1404600, to L.Z.), Outstanding Young Scholars Fund of Second Military Medical  
35 University (to L.Z.), and Disciplinary Joint Research Projects of Changhai Hospital  
36 (No.CH125510312, to L.Z.).  
37  
38  
39

40  
41 <sup>#Corresponding author:</sup> Prof. Zhao-Shen Li (Email: [zhaoshenli@hotmail.com](mailto:zhaoshenli@hotmail.com)), OR Zhuan  
42 Liao (Email: [liao.zhuan@gmail.com](mailto:liao.zhuan@gmail.com)), Department of Gastroenterology, Changhai Hospital,  
43 The Second Military Medical University, 168 Changhai Road, Shanghai, 200433, China. Tel.:  
44 +86-21-31161335; Fax: +86-21-55621735.  
45  
46  
47  
48

49 **Competing interest:** There is no conflict of interest to declare.  
50  
51  
52  
53  
54  
55  
56  
57  
58  
59  
60

## Abstract

**Objective:** Genetic alterations may contribute to chronic pancreatitis (CP) in Chinese young patients. This study was designed to investigate mutations of cationic trypsinogen (*PRSSI*), pancreatic secretory trypsin inhibitor or serine protease inhibitor Kazal type 1 (*SPINK1*), cystic fibrosis transmembrane conductance regulator (*CFTR*), chymotrypsin C (*CTRC*), and *CLDN2* genes and the copy number variations (CNVs) of *PRSSI* and assess associations with the development of idiopathic CP (ICP) in Chinese children.

**Design:** Retrospective.

**Setting:** A single center.

**Methods/Participants:** ~~Seventy-five ICP Chinese children (40 boys and 35 girls) were recruited for the assessment of *PRSSI*, *SPINK1*, *CFTR*, *CTRC* and *CLDN2* gene mutations and CNVs using DNA sequencing and TaqMan® Probe Based Gene Expression Analysis, respectively.~~

**Primary and secondary outcome measures:** Mutations of *PRSSI*, *SPINK1*, *CFTR*, *CTRC* and *CLDN2* genes and CNVs.

**Results:** Seven patients had heterozygous mutations in *PRSSI*, i.e. N29I (n=1), R122H or R122C (n=6). The CNVs of *PRSSI* in five patients had ~~unnormal~~ abnormal copies [1 copy (n=4), five copies (n=1)]. 43 patients had IVS3+2T>C (rs148954387) (10 homozygous and 33 heterozygous) in *SPINK1*. None of the *PRSSI* mutation patients carried a *SPINK1* mutation. Frequency of *PRSSI* and *SPINK1* mutations was 9.3% and 57.3%, respectively, with an overall frequency of 66.6% (50/75). In addition, one patient had a novel deletion of *CFTR* (GCTTCCTA from c.500 to c.508 leading to the shortened polypeptide molecule via a stop codon). Another patient had a novel missense in *CLDN2* exon 2 (c.592A>C mutation). Clinically, patients with *SPINK1* mutations had a higher rate of pancreatic duct stones, pancreatic pseudocyst, and pancreatic calcification than those without *SPINK1* mutations (P<0.05).

**Conclusions:** *SPINK1* mutations were more commonly associated with Chinese ICP children. *SPINK1* IVS3+2T>C mutation may play an important role in the pathogenesis of Chinese

Formatted: Font: Not Bold

Formatted: Font: Not Bold

Formatted: Font: (Default) Times New Roman, Bold, Font color: Black

pediatric ICP. However, further study is needed to confirm and to investigate the role of these genes in the development of Chinese ICP.

**Key words:** idiopathic chronic pancreatitis, *PRSSI*, *SPINK1*, *CFTR*, *CTRC*, *CLDN2*, CNVs, children

**Summary Box**

← [Article focus](#)

▲ [What is already known about this subject?](#)

- Genetic alterations may contribute to chronic pancreatitis in Chinese young patients.
- China is different from the Western countries in regards to ethnic and cultural backgrounds, socioeconomic status, climatic conditions, and dietary habits.

[Key messages](#) ~~What are the new findings?~~

- *SPINK1* IVS3+2T>C mutation was more commonly associated with Chinese ICP children.
- Pediatric patients with *SPINK1* IVS3+2T>C mutation had a higher rate of pancreatic duct stones, pancreatic pseudocyst, and pancreatic calcification than those without.

[How might it impact on clinical practice in the foreseeable future?](#)

Formatted: Line spacing: Double, No bullets or numbering

Formatted: Not Highlight

Formatted: Indent: Left: 0", First line: 0 ch, Line spacing: Double

Formatted: Font: Not Bold

Formatted: Line spacing: Double

- 1  
2  
3  
4  
5  
6  
7 • SPINK1 IVS3+2T>C mutation may play an important role in the pathogenesis of  
8 Chinese pediatric ICP, which may be show some insights into a novel target for therapy.  
9

10  
11 Strengths and limitations

- 12  
13  
14  
15  
16 • To the best of our knowledge, this is the first study to determine the spectrum and  
17 frequency of PRSS1, SPINK1, CFTR, CTRC and CLDN2 gene mutations and  
18 PRSS1 CNVs in unrelated CP children in China.  
19  
20  
21 • Further study is needed to confirm and to investigate the role of these genes in the  
22 development of Chinese ICP.  
23  
24  
25  
26  
27  
28  
29  
30  
31  
32  
33  
34  
35  
36  
37  
38  
39  
40  
41  
42  
43  
44  
45  
46  
47  
48  
49  
50  
51  
52  
53  
54  
55  
56  
57  
58  
59  
60

Formatted: Bulleted + Level: 1 + Aligned at:  
0" + Indent at: 0.29"

## Introduction

Chronic pancreatitis is an inflammatory disease characterized by irreversible destruction of the pancreatic normal structure and function and is associated with persistent abdominal pain or steatorrhea. In adults, alcohol abuse is an important cause of chronic pancreatitis, while other factors (such as anatomical changes, metabolic disease, trauma and heredity) may also cause or associate with chronic pancreatitis. However, up to 10-25% of patients with chronic pancreatitis have no clear risk factors and these patients are classified as having idiopathic chronic pancreatitis (ICP)<sup>1</sup>. In children, it is estimated that ICP accounts for approximately 40-60% of all children with chronic pancreatitis in Western countries, but the reported rate was as high as 73.8% in China<sup>2</sup>. The pathogenesis of ICP, especially in children, remains poorly understood. Since the conventional risk factors such as alcohol abuse are uncommon in children, it has reported that environmental risk factors may play a limited role in the pathogenesis of ICP in children; thus, patients with ICP at these ages are thought to be suitable for studies of genetic defects<sup>3</sup>.

Over the last two decades, genetic factors have been shown in patients with chronic pancreatitis and these factors are believed to play an important role in the pathogenesis of chronic pancreatitis<sup>4</sup>. For example, previous studies reported identification of mutations in genes encoding cationic trypsinogen (UniGene name: protease serine 1: *PRSSI*) (OMIM 276000)<sup>5</sup>, cystic fibrosis transmembrane conductance regulator (*CFTR*) (OMIM 602421)<sup>6</sup>, the pancreatic secretory trypsin inhibitor or serine protease inhibitor Kazal type 1 (PSTI or *SPINK1*) (OMIM 167790)<sup>3</sup>, and chymotrypsin C (*CTRC*) (OMIM 601405)<sup>7</sup>, all of which reveal that hereditary pancreatitis is a more common form of chronic pancreatitis than once thought<sup>1</sup>. More recently, a newly detected candidate gene known as *CLDN2* has been shown to be associated with sporadic and alcohol-related chronic pancreatitis<sup>8</sup>. Thus, genetic study may reveal a genetic basis for significant percentage of patients with so-called “idiopathic” chronic pancreatitis. It becomes acceptable that development of chronic pancreatitis requires a combination of genetic predisposition and environmental, structural, or toxic insult<sup>9</sup>.

1  
2  
3  
4  
5  
6  
7 Therefore, identification of genetic and environmental risk factors could offer the potential  
8 tool for risk assessment, early diagnosis, and earlier intervention of chronic pancreatitis<sup>10</sup>.  
9

10  
11 Many studies have discovered that mutations plus the copy number variations (CNVs) in  
12 *PRSSI* (trypsinogen), *SPINK1* (serine protease inhibitor Kazal-type 1), *CFTR* (cystic fibrosis  
13 transmembrane conductance regulator), and *CTRC* (chymotrypsin C, also known as caldecrin)  
14 were causally linked to the pathogenesis of ICP<sup>11-13</sup>, while patients with *PRSSI* or *SPINK1*  
15 mutations may be at a higher risk of developing pancreatic cancer<sup>14</sup>. *CFTR* variants were  
16 associated with idiopathic and alcoholic chronic pancreatitis. Furthermore, *CLDN2* was  
17 shown to be strongly associated with chronic pancreatitis, suggesting that it probably acts as a  
18 disease modifier to accelerate the development and progression of chronic pancreatitis  
19 through a non-trypsin-dependent process since *CLDN2* is a highly regulated tight junction  
20 protein to form ion and water channels between endothelial cells<sup>8</sup>. However, as the largest  
21 populated country in the world, the incidence of chronic pancreatitis, including pediatric  
22 chronic pancreatitis, has risen rapidly<sup>2, 15</sup>, whereas there have been only a few studies  
23 reporting that genetic factors contributed the pathogenesis of chronic pancreatitis in China,  
24 but none of these studies focused on ICP in children<sup>13, 16</sup>. In addition, China is different from  
25 the Western countries in regards to ethnic and cultural backgrounds, socioeconomic status,  
26 climatic conditions, and dietary habits. In this pilot study, we identified mutations in *PRSSI*,  
27 *SPINK1*, *CFTR*, *CTRC* and *CLDN2* genes and CNVs of *PRSSI* to determine the spectrum  
28 and frequency of the mutations and CNVs in unrelated children with ICP in the mainland of  
29 China. The data from this study will provide information into the genetic basis of pediatric  
30 ICP in China.  
31  
32  
33  
34  
35  
36  
37  
38  
39  
40  
41  
42  
43  
44  
45  
46  
47

## 48 **Patients and Methods**

### 49 *Study population and diagnosis criteria*

50  
51  
52 We recruited 75 ICP patients under 18 years old from Changhai Hospital between  
53 January 1997 and December 2008. There was no history of tobacco smoking or alcohol  
54  
55

1  
2  
3  
4  
5  
6  
7 consumption in these patients. All patients originated from the Han ethnicity in the mainland  
8 of China. The diagnose criteria of CP and ICP was defined as a condition characterized by  
9 typical history (abdominal pain, diabetes mellitus and/or steatorrhea) and the presence of any  
10 one of the following findings: i) ductal changes on ERCP; ii) pancreatic calcification on  
11 imaging examination; or iii) histological evidence of CP <sup>17-18</sup>. Furthermore, affected  
12 individuals were classified as having ICP if precipitating risk factors (such as alcohol abuse,  
13 trauma, previous medication, infection, metabolic disorders and/or a positive family history)  
14 were absent <sup>19</sup>. This study was approved by the Ethics Committee of Changhai Hospital,  
15 Shanghai and a written informed consent was given by their parents or legal guardians  
16 according to the ethical guidelines of the Declaration of Helsinki.  
17  
18  
19  
20  
21  
22  
23  
24  
25  
26

#### 27 ***DNA isolation***

28  
29 Peripheral blood samples were collected from each patient in a ethylene diamine tetra  
30 acetic acid (EDTA)-anticoagulated tube and frozen at -20°C for subsequent DNA extraction.  
31 Genomic DNA was isolated from 500 µl samples using the Lab-aid 800 automatic nucleic  
32 acid extraction machine following a standard protocol and quantified using a NanoDrop  
33 machine (Thermo, Wilmington, USA).  
34  
35  
36  
37  
38  
39

#### 40 ***PCR analyses of gene mutations***

41 DNA samples from patients were subjected to polymerase chain reaction (PCR) analyses  
42 of gene mutations. Specifically, primers flanking the targeted regions of *PRSSI*, *SPINK1*,  
43 *CFTR*, *CTRC* and *CLDN2* genes were designed and synthesized according to the nucleotide  
44 sequence published by NCBI as shown in Supplemental Table 1. The data on mutation  
45 analyses were confirmed by DNA sequence and repeated using PCR. PCR was performed in  
46 the GeneAmp 9700 System (Applied Biosystems, Foster city, CA) using a 15-µL reaction  
47 mixture containing 7.5 µl 2×Taq Mix (Vivantis, USA), 5.7 µl ddH<sub>2</sub>O, 1.5 µl DNA templates  
48 (10 ng/µl), and 0.15 µl of each primer (20 mM). PCR amplification was set at an initial 6 min  
49  
50  
51  
52  
53  
54  
55  
56  
57  
58  
59  
60

1  
2  
3  
4  
5  
6  
7 denaturation at 94°C, followed by 35 cycles of 30 s at 94°C, 30 s at 58°C (*PRSSI*, *SPINK1*)  
8 or 56°C (*CFTR*, *CTRC*, *CLDN2*), 45 s at 72°C, and a final extension at 72°C for 7 min. PCR  
9 products were then incubated with 0.1 U shrimp alkaline phosphatase at 37°C for 1 h,  
10 followed by heat inactivation at 85°C for 20 min and then sequenced using an ABI Prism  
11 BigDye Terminator Cycle Sequencing Kit, version 3.1 on an ABI Prism 3730 sequencer  
12 (Applied Biosystems). Data passed a duplicate quality-control test using four samples and  
13 showed 100% concordance.  
14  
15  
16  
17  
18

19 Vector NT1, Chromas and Bioedit software were applied to analyze the results.  
20  
21  
22

#### 23 24 ***Detection of gene copy number variations (CNVs)*** 25

26 A pre-designed and validated CNV assay kit to assess *PRSSI* CNVs was obtained from  
27 AB Life Technologies (Hs03184214\_cn) (see details in Supplemental Table 2). RT-PCR was  
28 performed using 2×Taqman Genotyping Master Mix 5 µl (Vivantis), ddH<sub>2</sub>O 0.5 µl, DNA  
29 templates (10 ng/µl) 4 µl, 0.25 µl Taqman Copy Number Assay (Vivantis) and 0.25 Taqman  
30 Copy Number Assay (Vivantis) in a total volume of 10 µl. Cycle conditions were as follows:  
31 initial denaturation for 10 minutes at 95°C, followed by 40 cycles of (15 s at 95°C, and 60s at  
32 60°C) in an 7900 RT-PCR thermal cycler (Applied Biosystems). The assays were performed  
33 in triplicate and repeated at least once for each sample. *PRSSI* gene copy number was  
34 calculated compared to the proportion to RNaseP reference assay (AB Life Technologies  
35 cat#4403326). Data were analyzed using Copy Caller Software (version 1.0 from AB Life  
36 Technologies).  
37  
38  
39  
40  
41  
42  
43  
44  
45  
46  
47

#### 48 ***Statistical analyses*** 49

50 Continuous data were reported as mean ± standard deviation (SD) analyzed using a  
51 Student's t-test and/or u-test. Fisher's exact test or chi-square test was used to analyze the  
52 categorical data. The gene mutations or CNVs were associated with age at diagnosis,  
53  
54  
55



1  
2  
3  
4  
5  
6  
7 pancreatic calcification, changes in pancreatic duct (stenosis or dilatation), pancreatic  
8 calcification, and pancreatic pseudocyst for clinical significance of these mutations<sup>19</sup>.

9  
10 The age onset was divided into two subgroups according to the mean value. A *P* value  
11 of less than 0.05 was considered statistically significant and all reported *P* values were  
12 two-sided.  
13  
14

## 15 16 17 18 **Results**

### 19 20 *Baseline clinical characteristics of study participants*

21  
22 A total of 75 unrelated children were included in this study, i.e., 40 boys and 35 girls and  
23 age at first onset was  $11.91 \pm 3.79$  years (ranged between 3 and 18 years). Clinically, 81.3%  
24 (61/75) of the patients showed acute pancreatitis, 13 patients began with pure abdominal pain,  
25 3 patients with weight loss, 1 patient with diarrhea, and 1 patient with high blood glucose.  
26  
27

28  
29 Imaging examinations, including CT, MRCP or ERCP, detected pancreatic duct stones  
30 in 45 patients, changes in pancreatic duct (stenosis or dilatation) in 57 patients, pancreatic  
31 calcification in 15 patients, pancreatic pseudocyst in 15 patients, and pancreatic divisum in 4  
32 patients (Table 1). Laboratory tests showed that six patients had increased levels of CA199, a  
33 biomarker for pancreatic cancer, six patients had high blood cholesterol, two had increased  
34 blood glucose, and two patients had low blood calcium levels.  
35  
36  
37  
38  
39  
40  
41  
42

### 43 44 *Analyses of PRSSI, SPINK1, CFTR and CTRC gene mutations in these patients*

45  
46 We then analyzed mutations of *PRSSI*, *SPINK1*, *CFTR* and *CTRC* gene in these 75  
47 patients and found three types of heterozygous *PRSSI* mutations in seven patients, including  
48 N29I (n=1) in exon 2, and R122H (n=6) with c.365G>A (n=5) and c.364C> T (n=1) in exon  
49 3(Supplemental Figure 1). A single gene mutation of *SPINK1* occurred in 43 patients,  
50 including 10 homozygous and 33 heterozygous *SPINK1* mutation (IVS3+2T>C). However,  
51 there was no single patient with *PRSSI* mutation who had a *SPINK1* mutation, making 9.3%  
52  
53  
54  
55  
56  
57  
58  
59  
60

1  
2  
3  
4  
5  
6  
7 (7/75) and 57.3% (43/75) of, *PRSSI* and *SPINK1* mutation rates, respectively and an overall  
8 rate of 66.6% (50/75) of patients who at least had one *PRSSI* or *SPINK1* mutation (Table 2).

9  
10 Furthermore, one patient had *CFTR* gene deletions of GCTTCCTA sequences between  
11 c.500 to c.508 at exon4, leading to an early stop codon (Figure 1). *CFTR* gene C.2562 T>G  
12 polymorphism was also detected in 51 patients, 14 of whom were homozygous.  
13 Heterozygous *CFTR* gene c.4389G>A mutation was identified in another patient. Moreover,  
14 there were four types of TG-repeats and poly-T tract including (TG)10-T7(n=2),  
15 (TG)11-T7(n=55), (TG)12-T5(n=5) and (TG)12-T7(n=13) in the junction of intron 8 and  
16 exon 9 and (TG)11-T7 of *CFTR* gene found in 73.3% of these patients (Supplemental Table  
17 3). In addition, *CFTR* gene V allele was slightly more frequent than the M allele at codon 470  
18 (59.3% and 40.7%, respectively). The dominant genotype was M/V followed by V/V and  
19 M/M (Supplemental Table 4).  
20  
21

22  
23 However, we screened six types of CTRC mutations, including c.143A>G, c.217G>A,  
24 c.180C>T in exon 3, c.703G>A, c.760C>T, and p.K247\_R254del in exon 7 in these 75  
25 patients, but did not find any mutations. In addition, we screened both exons of *CLDN2* and  
26 found four types of heterozygous mutations in a total of 26 patients (Table 2), i.e., c.22G>A  
27 at exon 1, c.327A>T, c.592A>C and c.768T>C at exon 2. C.592A>C is a missense mutation,  
28 while the other three types are nonsense. However, none of these patients had more than one  
29 type of *CLDN2* mutation.  
30  
31  
32  
33  
34  
35  
36  
37  
38  
39  
40  
41

#### 42 *Analyses of PRSSI gene copy number variations in these patients*

43  
44 *PRSSI* gene copy numbers were normal in most patients. Specifically, *PRSSI* gene copy  
45 number in 70 patients had two copies detected using the probe Hs03184214\_cn, whereas four  
46 patients had only one copy and another patient had five copies (Figure 2).  
47  
48  
49  
50  
51

#### 52 *Association of mutations with clinicopathological data*

We associated these genetic alterations with clinicopathological data from the 75 patients. Our data showed that three mutations of IVS3+2T>C in *SPINK1* gene, M470V and c.2562 T>G in *CFTR* gene had relatively higher frequencies than other genetic alterations and were associated with clinicopathological data. Briefly, the rates of pancreatic duct stones, pancreatic pseudocyst and pancreatic calcification were ~~significantly~~ higher in patients with a *SPINK1* gene IVS3+2T>C mutation than that of patients without IVS3+2T>C (69.8% vs., 46.9%  $P=0.045$ ; 11.6% vs. 31.25%  $P=0.036$ ; 27.9% vs. 9.4%  $P=0.047$ , respectively). The rate of pancreatic pseudocyst was ~~significantly~~ lower in patients with the *SPINK1* gene IVS3+2T>C mutation than that of patients without IVS3+2T>C (11.6% vs. 31.25%  $P=0.036$ ) (Table 3). However, there was no statistical significance between age at diagnosis of patients with and without IVS3+2T>C mutation. M470V and c.2562 T>G were not significantly associated with these clinical characteristics.

## Discussion

In the present study, we revealed *PRSSI*, *SPINK1*, *CFTR*, *CTRC* and *CLDN2* gene mutations in ICP patients, especially *PRSSI* and *SPINK1* gene mutations, occurred in almost 70% of Chinese ICP children. To the best of our knowledge, this is the first study to determine the spectrum and frequency of *PRSSI*, *SPINK1*, *CFTR*, *CTRC* and *CLDN2* gene mutations and *PRSSI* CNVs in unrelated CP children in China. The data indicate that genetic changes occurring in Chinese ICP patients could associate with ICP development. Further study will investigate how these gene alterations contribute to ICP development.

Our current data on the frequency of *PRSSI* mutations were similar to those (9.3% vs. 9-23%) of a previous study on children with CP or ICP<sup>20</sup>, however, our data on the frequency of *SPINK1* mutations (57.3%) appeared higher than those (19-40%) reported in the previous study<sup>3</sup>. Moreover, Witt et al.<sup>20</sup> first showed *PRSSI* gene mutations (3/30 cases at 3×A16V) in German pediatric CP patients. Thereafter, they showed that in a study of 96 unrelated CP children, *PRSSI* gene mutations (5×A16V, 1×N29I, and 5×R122H) occurred in 11 (11.5%)

1  
2  
3  
4  
5  
6  
7 patients<sup>3</sup>. In a review of 164 unrelated children with CP, the frequency was reported to be  
8 9.1% (n=15, 8×A16V, 5×R122H, and 2×N29I)<sup>21</sup>. *PRSSI* gene mutations were detected in  
9 two (12.5%, 1×R122H and 1×A16V) of 16 patients classified as having early-onset ICP in a  
10 Swiss study<sup>22</sup> and in 11 (23.1%) of 52 children with CP (6×R122H, 4×R122C, 1×N29I) in a  
11 Polish study<sup>23</sup>. In our current study, *PRSSI* mutations were found in 9.3% of 75 Chinese  
12 pediatric ICP patients, which included N29I and R122H mutations. Heterozygous mutations  
13 of the *PRSSI* gene commonly occurred in CP patients in the Western populations<sup>20,23</sup> and  
14 was the only form of mutation in our patients, indicating that the main spectrum and  
15 frequency of *PRSSI* gene mutations in Chinese ICP children are similar to those reported in  
16 pediatric patients in Western countries<sup>20-23</sup>. The *PRSSI* mutations seem to be one of the  
17 predisposing factors for ICP, irrespective of race, although the third most common *PRSSI*  
18 mutation (i.e., A16V) is not found in our study. However, these spectrum and frequency are  
19 different from most previous Asian studies, in which *PRSSI* mutations were at a low  
20 frequency or even absent<sup>13, 24-25</sup>. In a previous study on 129 Chinese ICP patients (34  
21 early-onset and 95 late-onset using a cut-off age of 35 years), Chang et al.<sup>13</sup> showed *PRSSI*  
22 mutations in six (4.6%) patients; in two (5.9%) patient with early-onset (1×R116C and  
23 1×C139S) and four (4.2%) patients with late-onset (1×L104P, 1×R116C, 1×T137M and  
24 1×C139S). These mutations are all considered relatively uncommon mutations in Western  
25 countries<sup>26</sup>. The potential reason for this discrepancy may be due to the sampling bias, i.e.,  
26 Chang's study included both children and adults, whereas our current study only included  
27 children.  
28  
29  
30  
31  
32  
33  
34  
35  
36  
37  
38  
39  
40  
41  
42

43 One of the most significant findings in our current study was the high frequency of  
44 *SPINK1* IVS3+2T>C mutation, which was first reported by Kume K et al. They showed a  
45 *SPINK1* IVS3+2T>C mutation in 13-16% of unrelated Japanese ICP patients<sup>27</sup>. However,  
46 two additional studies from Western countries reported IVS 3+2T>C mutation only in one  
47 (1.0%) of 96 and in 3 (2.7%) of 112 pediatric ICP patients<sup>3, 12</sup>. the IVS 3+2T>C mutation has  
48 been found in three (1.7%) of 172 German CP patients, but was thought to be a rare  
49 polymorphism and not a mutation<sup>28</sup>. However, a recent Chinese study on 129 ICP patients  
50  
51  
52  
53  
54  
55

1  
2  
3  
4  
5  
6  
7 revealed a IVS 3+2T>C mutation in 8.5% of patients and the mutation was predominantly  
8 responsible for early-onset ICP (29.4% in early-onset vs. 1.1% in late-onset)<sup>13</sup>. Alternatively,  
9 Pfutzer et al. [12] showed a frequency of N34S mutation in *SPINK1* in 40.4% (23/57) of  
10 American ICP children, whereas Truninger et al.<sup>11</sup> reported a frequency of the mutation at  
11 43% (6/14) German patients with early-onset ICP. In patients with tropical calcific  
12 pancreatitis, which is an idiopathic, juvenile, non-alcoholic form of CP widely prevalent in  
13 several tropical countries such as India, N34S mutation can reach 46%. In the present study,  
14 IVS 3+2T>C mutations were found in 57.3% (43/75) of unrelated Chinese ICP children, but  
15 we did not find any N34S mutations in the current study. These data suggest that the  
16 spectrum and frequency of *SPINK1* mutations vary geographically among different  
17 populations; IVS 3+2T>C mutations are more common in Chinese ICP children, whereas  
18 N34S mutations are more frequent in Western populations. The underlying role and  
19 molecular mechanisms of the IVS3+2T>C mutation in CP development are being explored.  
20 For example, this mutation was in complete linkage disequilibrium with -215G>A mutation,  
21 which might alter the efficiency of the *SPINK1* gene transcription. IVS3+2T>C mutation  
22 affects the splicing donor site that is highly conserved in eukaryotes<sup>3</sup>. IVS3+2T>C mutations  
23 can cause skipping of the whole of exon 3, where the trypsin binding site is located, leading  
24 to the loss of the trypsin binding site [27], altered expression of *SPINK1* protein in CP  
25 patients with the IVS3+2T>C mutation, affecting the protease/antiprotease balance within the  
26 pancreas. However, further studies are necessary to elucidate the underlying molecular  
27 mechanisms.

28  
29  
30  
31  
32  
33  
34  
35  
36  
37  
38  
39  
40  
41  
42  
43 In addition, the second significant finding of our current study is *CFTR* gene  
44 polymorphisms, such as M470V (n=51), c.2562T>G (n=51), TG repeats, and poly T tract in  
45 Chinese ICP children. We found that 68% (51/75) patients had both c.2562 T>G and M470V  
46 polymorphisms, including heterozygous and homozygous alleles and one patient with  
47 heterozygous c.4389G>A mutation. Both c.2562T>G and c.4389G>A mutations are nonsense,  
48 while an obstructive tubulopathy of the pancreas due to the *CFTR* dysfunction is thought to  
49 play a primary role in CP development, although the exact pathogenic process of pancreatitis  
50  
51  
52  
53  
54

1  
2  
3  
4  
5  
6  
7 associated with *CFTR* mutations is still under investigation. The function of *CFTR* in the  
8 pancreas is to dilute and alkalinize the protein-rich acinar secretions, so that the formation of  
9 protein plugs that lead to pancreatic injury may be prevented. A M470V polymorphism on  
10 exon 10 affects the intrinsic chloride activity, and thereby affects *CFTR* protein function. The  
11 TG repeats and poly-T tract can influence *CFTR* at transcription levels because these intronic  
12 variants could lead to reductions in protein synthesis and expression, or altered splicing to  
13 compromise the intracellular transport and/or activity. Huang et al conducted the first  
14 comprehensive study on the functional polymorphisms of *CFTR* in Chinese healthy subjects  
15 and found that T7 was the most common haplotype (93.6%) and (TG)11 and (TG)12 were the  
16 dominant haplotypes in the junction of intron 8 and exon 9<sup>29</sup>. Our current data also validated  
17 (TG)11-T7 as the most common type. The poly-T, TG-repeats and M470V distributions were  
18 similar to those studies on other East Asians<sup>30-31</sup>. In addition, a diverse range of *CFTR*  
19 loss-of-function variants have been reported to be associated with ICP and alcoholic CP,  
20 whereas their functional effects remain to be defined. Recently, Whitcomb et al reported that  
21 the coinheritance of *CFTR* R75Q and *SPINK1* variants is significantly higher in patients with  
22 ICP than in controls (8.75% vs. 0.38%). Using patch-clamp techniques, they also found that  
23 the *CFTR* genotype caused a selective defect in bicarbonate conductance<sup>32</sup>. Another study  
24 from Australia showed that symptomatic pancreatitis occurs in 20% of pancreatic sufficient  
25 cystic fibrosis patients. To evaluate genotype–phenotype interactions, they developed the  
26 Pancreatic Insufficiency Prevalence (PIP) score to determine severity in a large number of  
27 *CFTR* mutations and found that specific *CFTR* genotypes were associated with pancreatitis,  
28 i.e., patients carrying genotypes with mild phenotypic effects may have a greater risk of  
29 developing pancreatitis than patients carrying genotypes with moderate-severe phenotypic  
30 consequences at any given time<sup>33</sup>. In addition, common *CFTR* haplotypes seem to modulate  
31 susceptibility to CP.  
32  
33  
34  
35  
36  
37  
38  
39  
40  
41  
42  
43  
44  
45  
46  
47  
48  
49

50 Although multiple rare *CTRC* gene mutations have been associated with CP in European  
51 and Asian populations, our current study did not find any *CTRC* mutations in Chinese ICP  
52 children, indicating that *CTRC* mutation varies geographically or ethnically. According to the  
53  
54

1  
2  
3  
4  
5  
6  
7 biochemical activities and the functional properties of *CTRC* variants, Zhou and Sahin-Tóth  
8 hypothesized three mutually nonexclusive models to demonstrate the possible role of *CTRC*  
9 variants in predisposing to CP: i). Impaired trypsinogen and/or trypsin degradation; ii).  
10 Impaired activation of A-type carboxypeptidases; and iii). Induction of endoplasmic  
11 reticulum stress<sup>34</sup>. We infer that *CTRC* might play a limited role, if any, in the pathogenesis  
12 of CP in China.  
13  
14  
15  
16

17 However, until 2012, genetic variation in *CLDN2* has not previously been associated  
18 with disease in humans. A two-stage (discovery and replication) genome-wide association  
19 study (GWAS) showed that *CLDN2* genotype confers the greatest risk for CP, and its alleles  
20 via interacting with alcohol consumption, can amplify the risk. These data could partially  
21 explain the higher frequency of alcohol-related pancreatitis in men than women while the real  
22 causal relationship between CP and *CLDN2* has been ambiguously defined. Our current data  
23 are the first study on *CLDN2* SNPs in Chinese ICP patients to report four novel SNPs. Only  
24 one of these is a missense mutation known as c.592A>C in CDS of *CLDN2* gene, making the  
25 amino acid change from Met to Leu. This patient was a girl who was diagnosed as ICP after  
26 several episodes of acute pancreatitis since she was 13 years old. All of these clinical  
27 characteristics showed no deviances from other patients. Claudin-2 encoded by *CLDN2* is  
28 normally expressed at low levels in the tight junction between cells of the pancreatic ducts  
29 and in pancreatic islets. But when stressed, acinar cells can also express claudin-2, proved by  
30 porcine models of acute pancreatitis<sup>35</sup>. Besides, the *CLDN2* promoter includes a nuclear  
31 factor (NF)-κB-binding site<sup>36</sup>, and *CLDN2* expression is enhanced in other cells under  
32 conditions associated with injury and stress.  
33  
34  
35  
36  
37  
38  
39  
40  
41  
42  
43  
44

45 In an attempt to associate these mutations with clinical parameters from these ICP  
46 patients, we did not observe any association between the gene mutations and an earlier age of  
47 CP diagnosis, which is contrary to a previous study<sup>37</sup>. However, showed that patients with  
48 IVS3+2T>C mutation were more likely to have pancreatic duct stones or pancreatic  
49 calcification than those without such a mutation. It has been well known that patients with  
50 pancreatic calcification are more severe than those without pancreatic calcification.  
51  
52  
53  
54



1  
2  
3  
4  
5  
6  
7 Therefore, our observations, along with previous findings<sup>27</sup> suggest that a IVS3+2T>C  
8 mutation in *SPINK1* predisposes to more severity of CP. Moreover, CP patients have a  
9 markedly increased risk in developing pancreatic cancer compared to the general population  
10 [14, 15](#) and *PRSS1* or *SPINK1* mutation may be a predictor for pancreatic cancer development in  
11 CP patients. The IVS3+2T>C mutation was present in 0.6% of the sporadic pancreatic cancer  
12 patients. Thus, CP patients with *PRSS1* or *SPINK1* mutation should avoid any risk factors,  
13 including alcohol and tobacco, be monitored for any signs or symptoms (pain, weight loss,  
14 jaundice, and/or abdominal mass) or with serum markers and imaging examination for  
15 pancreatic cancer.  
16  
17  
18  
19  
20  
21

22  
23 CNVs often occur in human cancers and the compositions of CNVs may contain  
24 deletion, amplification, deletion plus amplification, multiple alleles and complicated locus.  
25 Lafrate and Sebat were the first to respectively report CNVs in human genome in 2004<sup>38</sup>. To  
26 date, many studies proved that both CNVs and SNP can affect gene expressions. However,  
27 the effect of *PRSS1* gene CNVs on ICP has not been fully studied. [In our study, the 4 patients  
28 with 1 copy were found not to be complicated with any mutations screened above. So,  
29 reduced CNV can also be detected in patients with ICP, contradicting the hypothesis that  
30 reduced CNV may be a protect factor, which needs further studies.](#)  
31  
32  
33  
34  
35  
36  
37  
38

### 39 Acknowledgements

40 We thank *Medjaden Bioscience Limited*, Hong Kong, China, for assistance in  
41 preparation of this manuscript.  
42  
43  
44

### 46 Contributorship statement

47 Prof. Zhuan Liao and Zhao-Shen Li conceived the project. Dr. Xiao-Tian Sun, Wei  
48 Wang, Xiao-Ling Weng, and Dai-Zhan Zhou completed the DNA isolation, PCR analyses of  
49 gene mutations, and detection of gene copy number variations (CNVs). Dr. Chang Sun, Tian  
50 Xia, Liang-Hao Hu, Xiao-Wei Lai, Bo Ye, Mu-Yun Liu, Fei Jiang, and Jun Gao collected the  
51  
52  
53  
54  
55



1  
2  
3  
4  
5  
6  
7 peripheral blood samples and clinical data. Lu-Min Bo and Yun Liu completed the statistical  
8 analyses.  
9  
10  
11  
12  
13  
14  
15  
16  
17  
18  
19  
20  
21  
22  
23  
24  
25  
26  
27  
28  
29  
30  
31  
32  
33  
34  
35  
36  
37  
38  
39  
40  
41  
42  
43  
44  
45  
46  
47  
48  
49  
50  
51  
52  
53  
54  
55  
56  
57  
58  
59  
60

For peer review only

## References

1. Keller J, Luyer P. Idiopathic chronic pancreatitis. *Best Pract Res Clin Gastroenterol* 2008;22:105-113.
2. Wang W, Liao Z, Li ZS, et al. Chronic pancreatitis in Chinese children: Etiology, clinical presentation and imaging diagnosis. *J Gastroenterol Hepatol* 2009;24:1862-1868.
3. Witt H, Luck W, Hennies HC, et al. Mutations in the gene encoding the serine protease inhibitor, Kazal type 1 are associated with chronic pancreatitis. *Nat Genet* 2000;25:213-216.
4. Chen JM, Férec C. Genetics and pathogenesis of chronic pancreatitis: the 2012 update. *Clin Res Hepatol Gastroenterol* 2012;36:334-40.
5. Whitcomb DC, Gorry MC, Peston RA, et al. Hereditary pancreatitis is caused by a mutations in the cationic trypsinogen. *Nat Genet* 1996;14:141-145.
6. Sharer N, Schwarz M, Malone G, et al. Mutations of the cystic fibrosis gene in patients with chronic pancreatitis. *N Engl J Med* 1998;339:645-652.
7. Rosendahl J, Witt H, Szmola R, et al. Chymotrypsin C (CTRC) mutations that diminish activity or secretion are associated with chronic pancreatitis. *Nat Genet* 2008;40:78-82.
8. Whitcomb DC, LaRusch J, Krasinskas AM, et al. Common genetic variants in the CLDN2 and PRSS1-PRSS2 loci alter risk for alcohol-related and sporadic pancreatitis. *Nat Genet* 2012;44:1349-54.
9. Witt H, Apte MV, Keim V, et al. Chronic pancreatitis: challenges and advances in pathogenesis, genetics, diagnosis, and therapy. *Gastroenterology* 2007;132:1557-1573.
10. Treiber M, Schlag C, Schmid RM. Genetics of pancreatitis: a guide for clinicians. *Curr Gastroenterol Rep* 2008;10:122-127.
11. Truninger K, Witt H, Kock J, et al. Mutations of the serine protease inhibitor, Kazal type 1 gene, in patients with idiopathic chronic pancreatitis. *Am J Gastroenterol* 2002;97:1133-1137.
12. Pfutzer RH, Barmada MM, Brunskil AP, et al. *SPINK1*/PSTI polymorphisms act as disease modifiers in familial and idiopathic chronic pancreatitis. *Gastroenterology* 2000;119:615-623.
13. Chang YT, Wei SC, L PC, et al. Association and differential role of *PRSSI* and *SPINK1* mutations in early-onset and late-onset idiopathic chronic pancreatitis in Chinese subjects. *Gut* 2009;58:885.
14. Rebours V, Boutron-Ruault MC, Schnee M, et al. The natural history of hereditary pancreatitis: a national series. *Gut* 2009;58:97-103.

15. Wang LW, Li ZS, Li SD, et al. Prevalence and clinical features of chronic pancreatitis in China: A retrospective multicenter analysis over 10 years. *Pancreas* 2009;38:248-254.
16. Chang MC, Chang YT, Wei SC, et al. Association of Novel Chymotrypsin C Gene Variations and Haplotypes in Patients with Chronic Pancreatitis in Chinese in Taiwan. *Pancreatology* 2009;9:287-292.
17. Tandon RK, Sato N, Garg PK, Consensus Study Group. Chronic pancreatitis: Asia-Pacific consensus report. *J Gastroenterol Hepatol* 2002;17:508-518.
18. Axon AT, Classen M, Cotton PB. Pancreatography in chronic pancreatitis: International definitions. *Gut* 1984;25:1107-1112.
19. Witt H, Sahin-Tóth M, Landt O, et al. A degradation-sensitive anionic trypsinogen (PRSS2) variant protects against chronic pancreatitis. *Nat Genet* 2006;38:668-673.
20. Witt H, Luck W, Becker M. A signal peptide cleavage site mutations in the cationic trypsinogen is strongly associated with chronic pancreatitis. *Gastroenterology* 1999;117:7-10.
21. Witt H. Gene mutations in children with chronic pancreatitis. *Pancreatology* 2001;1:432-438.
22. Truninger K, Kock J, Wirth HP, et al. Trypsinogen gene mutations in patients with chronic or recurrent acute pancreatitis. *Pancreas* 2001;22:18-23.
23. Sobczynska-Tomaszewska A, Bak D, Oralewska B, et al. Analysis of CFTR, *SPINK1*, *PRSSI* and AAT mutations in children with acute or chronic pancreatitis. *J Pediatr Gastroenterol Nutr* 2006;43:299-306.
24. Nishimori I, Kamakura M, Fujikawa-Adachi K, et al. Mutations in exons 2 and 3 of the cationic trypsinogen gene in Japanese families with hereditary pancreatitis. *Gut* 1999;44:259-263.
25. Oh HC, Kim MH, Choi KS, et al. Analysis of *PRSSI* and *SPINK1* mutations in Korean patients with idiopathic and familial pancreatitis. *Pancreas* 2009;38:180-183.
26. Teich N, Rosendahl J, Toth M, et al. Mutations of human cationic trypsinogen (*PRSSI*) and chronic pancreatitis. *Hum Mutat* 2006, 27: 721-730.
27. Kume K, Masamune A, Kikuta K, et al. [-215G>A; IVS3+2T>C] mutation in the *SPINK1* gene causes exon 3 skipping and loss of the trypsin binding site. *Gut* 2006;55:1214.
28. Kalinin VN, Kaifi JT, Schwarzenbach H, et al. Association of rare *SPINK1* gene mutation with another base substitution in chronic pancreatitis patients. *World J Gastroenterol* 2006;12:5352-5356.

- 1
- 2
- 3
- 4
- 5
- 6
- 7 29. Huang Q, Ding W, Wei MX. Comparative analysis of common CFTR polymorphisms
- 8 poly-T, TG-repeats and M470V in a healthy Chinese population. *World J Gastroenterol*
- 9 2008;14:1925-30.
- 10
- 11 30. Nam MH, Hijikata M, Tuan le A, et al. Variations of the CFTR gene in the
- 12 Hanoi-Vietnamese. *Am J Med Genet A* 2005;136:249-53.
- 13
- 14 31. Fujiki K, Ishiguro H, Ko SB, et al. Genetic evidence for CFTR dysfunction in Japanese:
- 15 background for chronic pancreatitis. *J Med Genet* 2004; 41:e55.
- 16
- 17 32. Schneider A, Larusch J, Sun X, et al. Combined bicarbonate conductance-impairing
- 18 variants in CFTR and SPINK1 variants are associated with chronic pancreatitis in
- 19 patients without cystic fibrosis. *Gastroenterology* 2011;140:162-71.
- 20
- 21 33. Chee Y, Ooi, Peter R. Cystic fibrosis transmembrane conductance regulator (CFTR) gene
- 22 mutations in pancreatitis. *Journal of Cystic Fibrosis* 2012;11:355-62.
- 23
- 24 34. Zhou J, Sahin-Tóth M. Chymotrypsin C mutations in chronic pancreatitis. *J*
- 25 *Gastroenterol Hepatol* 2011;26:1238-46.
- 26
- 27 35. Lee JH, Kim KS, Kim TJ, et al. Immunohistochemical analysis of claudin expression in
- 28 pancreatic cystic tumors. *Oncol. Rep* 2011;25:971-78.
- 29
- 30 36. Sakaguchi T, Gu X, Golden HM, et al. Cloning of the human claudin-2 5'-flanking
- 31 region revealed a TATA-less promoter with conserved binding sites in mouse and human
- 32 for caudal-related homeodomain proteins and hepatocyte nuclear factor-1alpha. *J Biol*
- 33 *Chem.* 2002;277:21361-70.
- 34
- 35 37. Howes N, Lerch MM, Greenhalf W, et al. Clinical and genetic characteristics of
- 36 hereditary pancreatitis in Europe. *Clin Gastroenterol Hepatol* 2004;2:252-261.
- 37
- 38 38. Sebat J, Lakshmi B, Troge J, et al. Large-scale copy number polymorphism in the human
- 39 genome. *Science* 2004;305:525-528.
- 40
- 41
- 42
- 43
- 44
- 45
- 46
- 47
- 48
- 49
- 50
- 51
- 52
- 53
- 54
- 55
- 56
- 57
- 58
- 59
- 60

Table 1 Characteristics of the ICP study participants

|                                        |              |
|----------------------------------------|--------------|
| Age, median (range), years             | 11.91 (3-18) |
| Sex, n (%)                             |              |
| Female                                 | 35           |
| Male                                   | 40           |
| Clinical symptoms, n (%)               |              |
| Acute pancreatitis                     | 61           |
| Pure abdominal pain                    | 13           |
| Weight loss                            | 3            |
| Diarrhea                               | 1            |
| High blood glucose                     | 1            |
| Other                                  | 0            |
| Imaging examination (CT, MRCP or ERCP) |              |
| Pancreatic duct stenosis or dilation   | 57           |
| Pancreatic duct stones                 | 45           |
| Pancreatic pseudocyst                  | 15           |
| Pancreatic calcification               | 15           |
| Other                                  | 4*           |
| Laboratory tests                       |              |
| Increased CA199                        | 6            |
| Increased blood cholesterol            | 6            |
| Increased blood glucose                | 2            |
| Decreased blood calcium                | 2            |

\* Pancreatic Divisum

Table 2 *PRSSI*, *SPINK1*, *CFTR* and *CTRC* gene mutations in the ICP patients

| Gene mutations       | Region  | Functional class | Positive, n (%) |
|----------------------|---------|------------------|-----------------|
| <b><i>PRSSI</i></b>  |         |                  |                 |
| A16V                 | Exon 2  | Missense         | 0               |
| N29I                 | Exon 2  | Missense         | 1 (1.3)         |
| E79K                 | Exon 3  | Missense         | 0               |
| R116C                | Exon 3  | Missense         | 0               |
| A121T                | Exon 3  | Missense         | 0               |
| R122H or R122C       | Exon 3  | Missense         | 6 (8.0)*        |
| <b><i>SPINK1</i></b> |         |                  |                 |
| N34S                 | Exon 3  | Missense         | 0               |
| IVS3+2T>C            | IVS 3   | Splicing         | 43 (57.3)**     |
| <b><i>CFTR</i></b>   |         |                  |                 |
| R117H                | Exon 4  | Missense         | 0***            |
| F508del              | Exon 11 | Del              | 0               |
| c.2562T>G            | Exon 15 | Nonsense         | 51 (68.0)****   |
| c.4389G>A            | Exon 27 | Nonsense         | 1 (1.3)         |
| <b><i>CTRC</i></b>   |         |                  |                 |
| c.143A>G             | Exon 3  | Missense         | 0               |
| c.180C>T             | Exon 3  | Nonsense         | 0               |
| c.217G>A             | Exon 3  | Missense         | 0               |

1  
2  
3  
4  
5  
6  
7  
8  
9  
10  
11  
12  
13  
14  
15  
16  
17  
18  
19  
20  
21  
22  
23  
24

|              |                |        |          |    |
|--------------|----------------|--------|----------|----|
|              | c.703G>A       | Exon 7 | Missense | 0  |
|              | c.760C>T       | Exon 7 | Missense | 0  |
|              | p.K247_R254del | Exon 7 | Del      | 0  |
| <b>CLDN2</b> |                |        |          |    |
|              | c.22G>A        | Exon 1 | Nonsense | 2  |
|              | c.327A>T       | Exon 2 | Nonsense | 1  |
|              | c.592A>C       | Exon 2 | Missense | 1  |
|              | c.768T>C       | Exon 2 | Nonsense | 22 |

25 \* one was c.364 C>T and other five were c.365 G>A

26 \*\* 33 were heterozygous and 10 were homozygous

27 \*\*\* one patient has the deletions of GCTTCCTA from c.500 to c.508

28 \*\*\*\* 37 were heterozygous and 14 were homozygous

29  
30  
31  
32  
33  
34  
35  
36  
37  
38  
39  
40  
41  
42  
43  
44  
45  
46  
47  
48  
49  
50  
51  
52  
53  
54  
55

Formatted: Width: 11.69", Height: 8.27"

Table 3 Association of gene mutation (IVS3+2T>C, M470V and c.2562T>G) with clinicopathological data from the 75 patients

| Mutations | Age at diagnosis |     |                |       | Pancreatic duct stenosis<br>or dilation |    |                |       | Pancreatic duct stones |    |                |       | Pancreatic pseudocyst |    |                |       | Pancreatic calcification |    |                |       |       |
|-----------|------------------|-----|----------------|-------|-----------------------------------------|----|----------------|-------|------------------------|----|----------------|-------|-----------------------|----|----------------|-------|--------------------------|----|----------------|-------|-------|
|           | <12              | ≥12 | X <sup>2</sup> | P     | Yes                                     | No | X <sup>2</sup> | P     | Yes                    | No | X <sup>2</sup> | P     | Yes                   | No | X <sup>2</sup> | P     | Yes                      | No | X <sup>2</sup> | P     |       |
|           | value            |     |                |       | value                                   |    |                |       | value                  |    |                |       | value                 |    |                |       |                          |    |                |       |       |
| IVS3+2T>C | Yes              | 17  | 26             | 0.815 | 0.367                                   | 34 | 9              | 0.521 | 0.471                  | 30 | 13             | 4.006 | 0.045                 | 5  | 38             | 4.415 | 0.036                    | 12 | 31             | 3.938 | 0.047 |
|           | No               | 16  | 16             |       |                                         | 23 | 9              |       |                        | 15 | 17             |       |                       | 10 | 22             |       |                          | 3  | 29             |       |       |
| M470V     | MM               | 18  | 23             | 0.199 | 0.905                                   | 32 | 9              | 0.305 | 0.859                  | 25 | 16             | 0.773 | 0.679                 | 9  | 32             | 1.566 | 0.457                    | 11 | 30             | 2.664 | 0.264 |
|           | MV               | 5   | 5              |       |                                         | 7  | 3              |       |                        | 7  | 3              |       |                       | 3  | 7              |       |                          | 1  | 9              |       |       |
|           | VV               | 10  | 14             |       |                                         | 18 | 6              |       |                        | 13 | 11             |       |                       | 3  | 21             |       |                          | 3  | 21             |       |       |
| c.2562T>G | Yes              | 23  | 28             | 0.078 | 0.780                                   | 39 | 12             | 0.019 | 0.899                  | 32 | 19             | 0.500 | 0.479                 | 12 | 39             | 1.241 | 0.265                    | 12 | 39             | 1.241 | 0.265 |
|           | No               | 10  | 14             |       |                                         | 18 | 6              |       |                        | 13 | 11             |       |                       | 3  | 21             |       |                          | 3  | 21             |       |       |



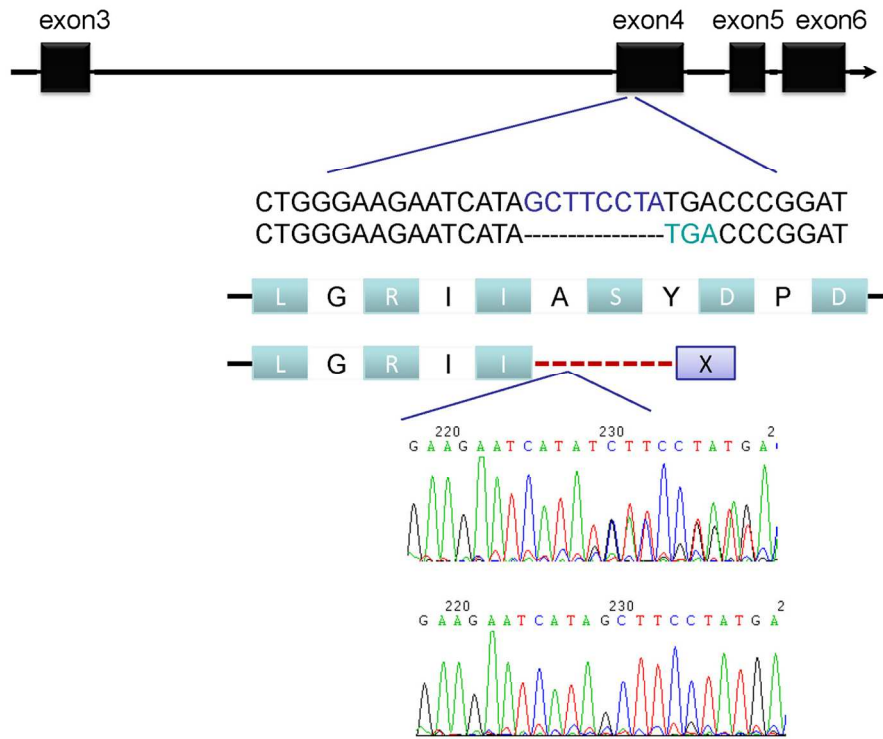

Figure 1. A Novel CFTR gene deletion detected using DNA sequence of PCR products.  
 129x106mm (300 x 300 DPI)

1  
2  
3  
4  
5  
6  
7  
8  
9  
10  
11  
12  
13  
14  
15  
16  
17  
18  
19  
20  
21  
22  
23  
24  
25  
26  
27  
28  
29  
30  
31  
32  
33  
34  
35  
36  
37  
38  
39  
40  
41  
42  
43  
44  
45  
46  
47  
48  
49  
50  
51  
52  
53  
54  
55  
56  
57  
58  
59  
60

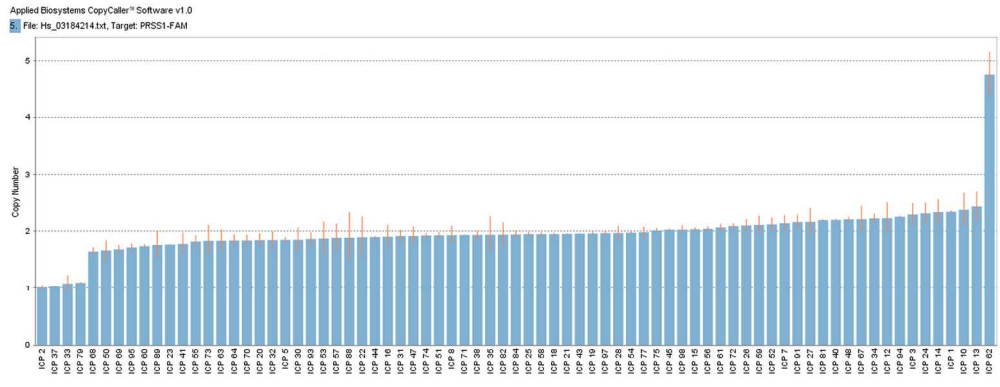

Figure 2. Copy number variations (Hs03184214\_cn) of PRSS1 gene in 75 Chinese ICP patients. 319x119mm (300 x 300 DPI)

Peer review only

Supplemental Table 1. PCP primers used to detect *PRSSI*, *SPINK1*, *CFTR*, *CTRC* and *CLDN2* gene mutations

| Gene                     |         | Primers                         |
|--------------------------|---------|---------------------------------|
| <i>PRSSI</i>             |         |                                 |
| A16V, N29I               | Forward | 5'-cagagacttgggagccaca-3'       |
|                          | Reverse | 5'-accacaacccttggtgttcc-3'      |
| E79K,R116C, A121T, R122H | Forward | 5'-acctcactgaccacatcc-3'        |
|                          | Reverse | 5'-agccaagtccttgatagttgc-3'     |
| <i>SPINK1</i>            |         |                                 |
| N34S                     | Forward | 5'-aaggtttctgtctccagatagtagg-3' |
|                          | Reverse | 5'-ccaagctatcgactattttgctg-3'   |
| IVS3+2T>C                | Forward | 5'-agatgtggccaacctgagag-3'      |
|                          | Reverse | 5'-gcttttctcggggtgagatt-3'      |
| <i>CFTR</i>              |         |                                 |
| R117H                    | Forward | 5'-aaactgtctcccactgttgc-3'      |
|                          | Reverse | 5'-caacagaggcagtttacagaaga-3'   |
| 1210TG/T                 | Forward | 5'-ggccatgtgctttcaacta-3'       |
|                          | Reverse | 5'-cgccaacaactgtcctcttt-3'      |
| M470V                    | Forward | 5'-caagtgaatcctgagcgtga-3'      |
|                          | Reverse | 5'-tgctttgatgacgcttctgt-3'      |

|    |                             |         |                               |
|----|-----------------------------|---------|-------------------------------|
| 1  |                             |         |                               |
| 2  |                             |         |                               |
| 3  |                             |         |                               |
| 4  | F508del                     | Forward | 5'-cccttgatcttttgatagc-3'     |
| 5  |                             |         |                               |
| 6  |                             | Reverse | 5'-gcttctaaagcataggtcatgtg-3' |
| 7  |                             |         |                               |
| 8  |                             |         |                               |
| 9  | c.2562T>G                   | Forward | 5'-acaatggtggcatgaaactg-3'    |
| 10 |                             |         |                               |
| 11 |                             | Reverse | 5'-gccttctactttgagctttcg-3'   |
| 12 |                             |         |                               |
| 13 |                             |         |                               |
| 14 | c.4389G>A                   | Forward | 5'-cgacagggtgaagctcttc-3'     |
| 15 |                             |         |                               |
| 16 |                             | Reverse | 5'-tctggcttgcaaacacaag-3'     |
| 17 |                             |         |                               |
| 18 |                             |         |                               |
| 19 |                             |         |                               |
| 20 | <i>CTRC</i>                 |         |                               |
| 21 |                             |         |                               |
| 22 |                             |         |                               |
| 23 | c.143A>G,c.180C>T, c.217G>A | Forward | 5'-gtgtagggctgggaggtaca-3'    |
| 24 |                             |         |                               |
| 25 |                             | Reverse | 5'-ttcccgagagcacagacttt-3'    |
| 26 |                             |         |                               |
| 27 |                             |         |                               |
| 28 | c.703G>A,c.760C>T,          | Forward | 5'-cagttggagaacggttctg-3'     |
| 29 | c.738_761del24              |         |                               |
| 30 |                             | Reverse | 5'-gtgcttgatgaaggcagtga-3'    |
| 31 |                             |         |                               |
| 32 |                             |         |                               |
| 33 | <i>CLDN2</i>                |         |                               |
| 34 |                             |         |                               |
| 35 |                             |         |                               |
| 36 | Exon 1                      | Forward | 5'-ctgccaacacagtctcctca-3'    |
| 37 |                             |         |                               |
| 38 |                             | Reverse | 5'-ggatttggtgcctagggtga-3'    |
| 39 |                             |         |                               |
| 40 |                             |         |                               |
| 41 | Exon 2*                     | Forward | 5'-gtcagcctggcagagagact-3'    |
| 42 |                             |         |                               |
| 43 |                             | Reverse | 5'-ctgtgtgtggcacattccat-3'    |
| 44 |                             |         |                               |
| 45 |                             | Forward | 5'-ttgtgacagcagttggcttc-3'    |
| 46 |                             |         |                               |
| 47 |                             | Reverse | 5'-caagaggttgggcttgtag-3'     |
| 48 |                             |         |                               |
| 49 |                             | Forward | 5'-cctgggattcattcctgttg-3'    |
| 50 |                             |         |                               |
| 51 |                             | Reverse | 5'-tccagtgtagtgcctca-3'       |
| 52 |                             |         |                               |
| 53 |                             |         |                               |
| 54 |                             |         |                               |
| 55 |                             |         |                               |
| 56 |                             |         |                               |

\* Exon 2 was divided into 3 segments due to the limitation on the number of bases of sequencing.

1  
2  
3  
4  
5  
6  
7  
8  
9  
10  
11  
12  
13  
14  
15  
16  
17  
18  
19  
20  
21  
22  
23  
24  
25  
26  
27  
28  
29  
30  
31  
32  
33  
34  
35  
36  
37  
38  
39  
40  
41  
42  
43  
44  
45  
46  
47  
48  
49  
50  
51  
52  
53  
54  
55  
56  
57  
58  
59  
60

For peer review only

Supplemental Table 2. Probe used to screen *PRSS-1* CNVs

|                |                                 |
|----------------|---------------------------------|
| Probe          | Hs03184214_cn                   |
| Assay Location | Chr7:142460752 on NCBI build 37 |
| Cytoband       | 7q34f                           |
| Species        | H. sapiens                      |
| Variation Type | Copy Number                     |

Supplemental Table 3. TG-repeats and poly-T tract polymorphism in the junction of intron 8 (IVS-8) and exon 9 of *CFTR*

| Total     | Number | Number (frequencies) of individuals with genotypes |            |           |            |
|-----------|--------|----------------------------------------------------|------------|-----------|------------|
| (n)       |        | (TG)10-T7                                          | (TG)11-T7  | (TG)12-T5 | (TG)12-T7  |
| 75 (100%) |        | 2 (2.7%)                                           | 55 (73.3%) | 5 (6.7%)  | 13 (17.3%) |

Supplemental Table 4. M470V polymorphism at exon 10 of *CFTR*

| Total<br>Number<br>(n) | Number (frequencies) of individuals<br>with genotypes |           |         | Number (frequencies) of<br>individuals with alleles |           |
|------------------------|-------------------------------------------------------|-----------|---------|-----------------------------------------------------|-----------|
|                        | MM                                                    | MV        | VV      | M                                                   | V         |
| 75(100%)               | 10(13.3%)                                             | 41(54.7%) | 24(32%) | 61(40.7%)                                           | 89(59.3%) |



Supplemental Figure 1. Representative illustrations of mutations detected in 75 patients with idiopathic chronic pancreatitis.

A, Representatives of exon 3 in *PRSS1* gene in patients without mutation (top), patients with heterozygous R122C mutation (middle) and patients with heterozygous p.R122H mutation (bottom). *R122C* and *R122H* mutations are reflected by C→T and G→A transitions, respectively, at codon 122 that result in an arginine to cysteine and histidine substitution at amino acid 122, respectively.

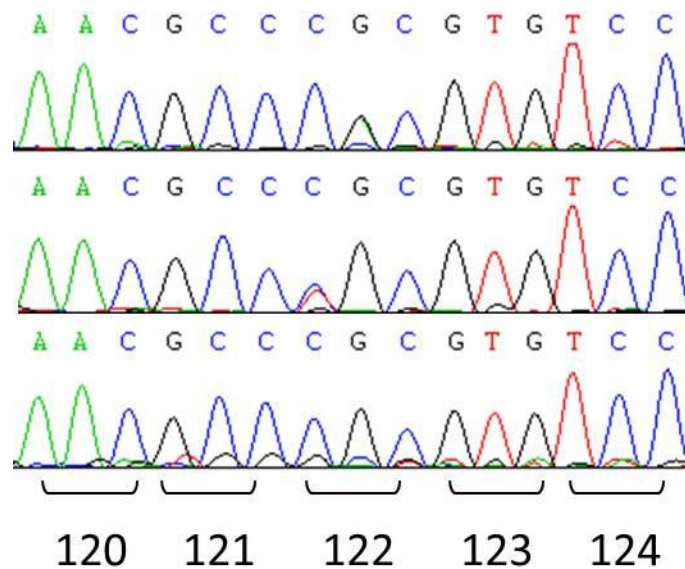

Arg: CGC  
 ↓↓  
 Cys: TGC (R122C)  
 His: CAC (R122H)

1  
2  
3  
4 B, Representatives of *PRSSI* gene exon 2 in patients without mutation (top), patients  
5  
6 with heterozygous N29I (bottom) mutations. N29I mutation is reflected by A→T  
7  
8 transition at codon 29 that results in an asparagine to isoleucine substitution at amino  
9  
10 acid 29.  
11  
12

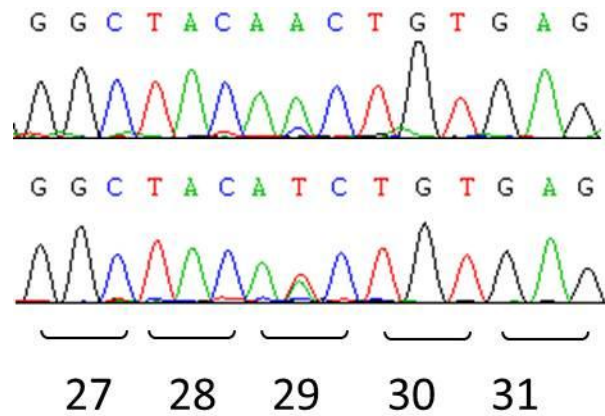

28  
29  
30 Asp: AAC

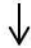

32  
33 Ile : ATC  
34  
35  
36  
37  
38  
39  
40  
41  
42  
43  
44  
45  
46  
47  
48  
49  
50  
51  
52  
53  
54  
55  
56  
57  
58  
59  
60

1  
2  
3  
4  
5  
6  
7  
8  
9  
10  
11  
12  
13  
14  
15  
16  
17  
18  
19  
20  
21  
22  
23  
24  
25  
26  
27  
28  
29  
30  
31  
32  
33  
34  
35  
36  
37  
38  
39  
40  
41  
42  
43  
44  
45  
46  
47  
48  
49  
50  
51  
52  
53  
54  
55  
56  
57  
58  
59  
60

For peer review only

C, Representatives of the nucleotide sequences in *SPINK1* gene promoter region in patients without mutation (top), patients with homozygous IVS3+2T>C mutation (middle) and those with heterozygous IVS3+2T>C mutation (bottom). IVS3+2T>C mutation is reflected by C residue, instead of T, at nucleotide 2 downstream from the end point of exon 3 (right).

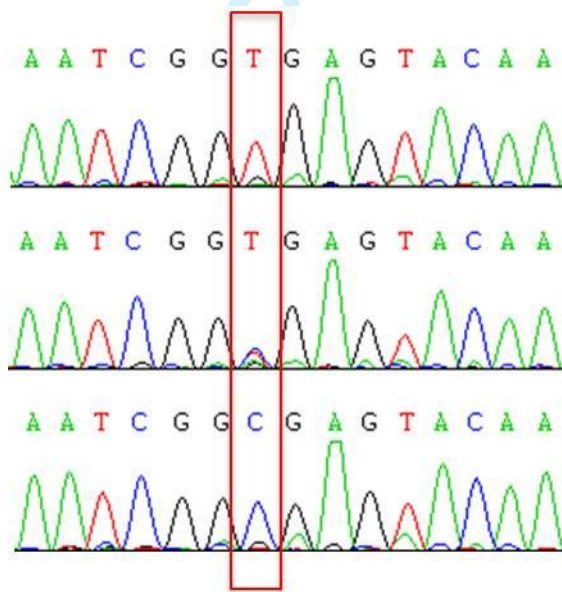

D, Representatives of *CFTR* gene exon 10 mutation in patients without mutation (top), patients with heterozygous M470V mutation (middle) and patients with homozygous M470V mutation (bottom). This mutation is reflected by G→A transition, at codon 470 that results in a valine to methionine substitution at amino acid 470 (anti-sense sequence).

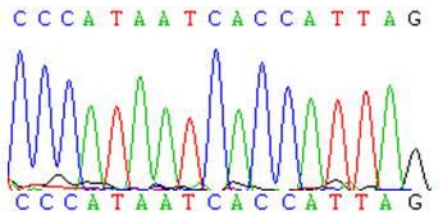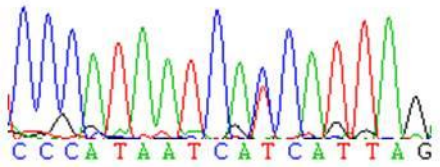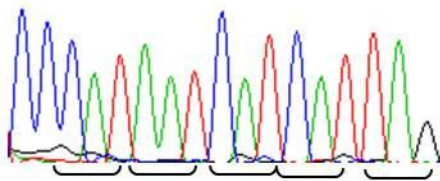

23  
24  
25

468 469 470 471 472

26  
27  
28  
29  
30  
31  
32

Val: GTG  
↓  
Met: ATG

33  
34  
35  
36  
37  
38  
39  
40  
41  
42  
43  
44  
45  
46  
47  
48  
49  
50  
51  
52  
53  
54  
55  
56  
57  
58  
59  
60

view only

1  
2  
3  
4 E, Representatives of *CFTR* gene exon 27 mutation in patients without mutation (top),  
5  
6 patients with heterozygous c.4389G>A mutation (bottom). This mutation is reflected  
7  
8  
9 by G→A transition, at codon 1463 that is nonsense one ( anti-sense sequence).  
10

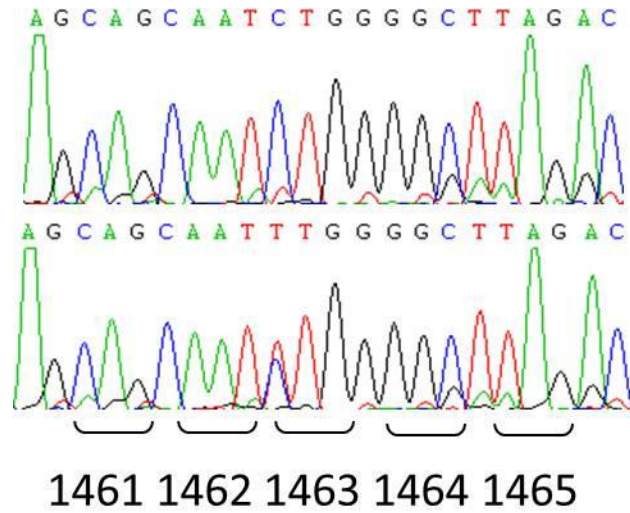

30 Gln: CAG  
31 ↓  
32 Gln: CAA  
33  
34  
35  
36  
37  
38  
39  
40  
41  
42  
43  
44  
45  
46  
47  
48  
49  
50  
51  
52  
53  
54  
55  
56  
57  
58  
59  
60

view only

1  
2  
3  
4 F, Representatives of *CFTR* gene exon 15 mutation in patients without mutation (top),  
5  
6 patients with heterozygous c.2562T>G mutation (middle) and patients with  
7  
8 homozygous c.2562T>G mutation (bottom). This mutation is reflected by T→G  
9  
10 transition, at codon 854 that is nonsense one.  
11  
12

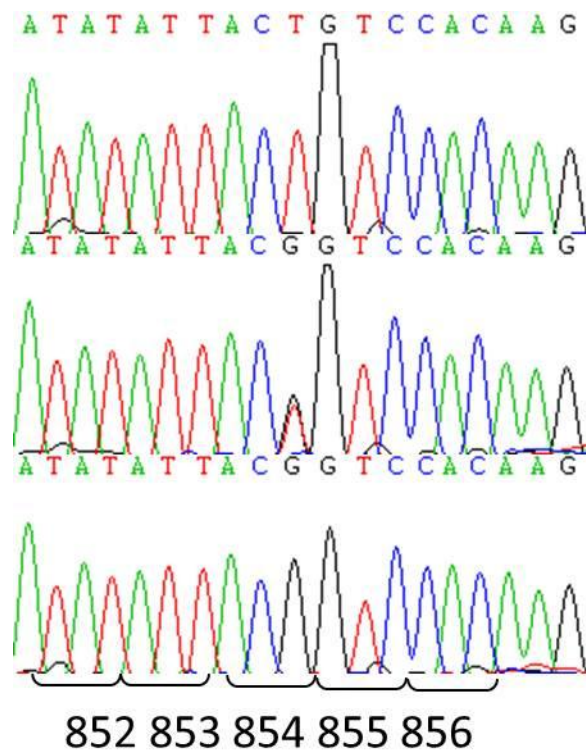

38  
39  
40 Thr: ACT  
41  
42 ↓  
43  
44 Thr: ACG  
45  
46  
47  
48  
49  
50  
51  
52  
53  
54  
55  
56  
57  
58  
59  
60

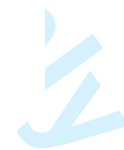

1  
2  
3  
4  
5  
6  
7  
8  
9  
10  
11  
12  
13  
14  
15  
16  
17  
18  
19  
20  
21  
22  
23  
24  
25  
26  
27  
28  
29  
30  
31  
32  
33  
34  
35  
36  
37  
38  
39  
40  
41  
42  
43  
44  
45  
46  
47  
48  
49  
50  
51  
52  
53  
54  
55  
56  
57  
58  
59  
60

G, Representatives of *CLDN2* gene exon 2 mutation in patients without mutation (top), patients with heterozygous mutation (bottom). This mutation is reflected by A→C transition that is missense. (anti-sense sequence)

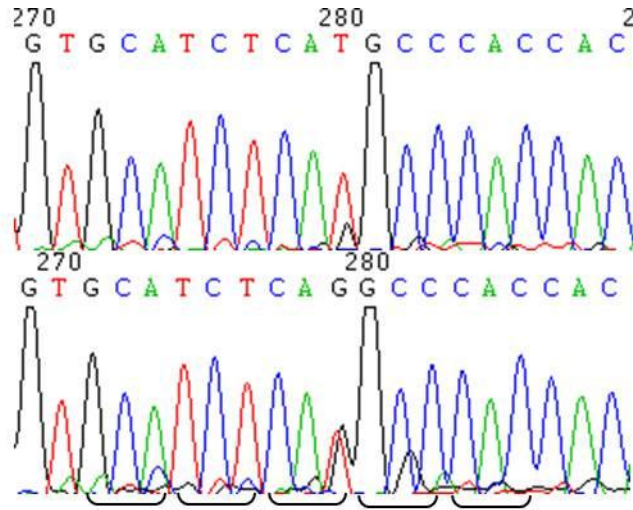

Met: ATG  
 ↓  
 Leu: CTG

Peer review only
